# Supplementary material for: Effect of Topically Applied Anaesthetic Formulation on the Sensitivity of Scoop Dehorning Wounds in Calves
Source: PLoS One. 2016 Sep 20;11(9):e0163181. doi: 10.1371/journal.pone.0163181 (PMC5029898; doi:10.1371/journal.pone.0163181)
Supplement: S1 File — (XLSX) [file pone.0163181.s001.xlsx]

## Sheet: Trial 1
Calf	Treatment	Time (min)	von Frey (g/f)	Area	Score (+ 1)
1	ethanol spray	0	300	wound	1
1	ethanol spray	0	300	wound	1
1	ethanol spray	0	300	peri-wound	1
1	ethanol spray	0	300	peri-wound	1
1	ethanol spray	0	300	wound	1
1	ethanol spray	0	300	wound	1
1	ethanol spray	0	300	peri-wound	1
1	ethanol spray	0	300	peri-wound	1
1	ethanol spray	0	75	wound	1
1	ethanol spray	0	75	wound	1
1	ethanol spray	0	75	peri-wound	1
1	ethanol spray	0	75	peri-wound	1
1	ethanol spray	0	75	wound	1
1	ethanol spray	0	75	wound	1
1	ethanol spray	0	75	peri-wound	1
1	ethanol spray	0	75	peri-wound	2
1	ethanol spray	1	300	wound	2
1	ethanol spray	1	300	wound	1
1	ethanol spray	1	300	peri-wound	1
1	ethanol spray	1	300	peri-wound	3
1	ethanol spray	1	300	wound	1
1	ethanol spray	1	300	wound	1
1	ethanol spray	1	300	peri-wound	1
1	ethanol spray	1	300	peri-wound	2
1	ethanol spray	1	75	wound	2
1	ethanol spray	1	75	wound	2
1	ethanol spray	1	75	peri-wound	2
1	ethanol spray	1	75	peri-wound	2
1	ethanol spray	1	75	wound	2
1	ethanol spray	1	75	wound	1
1	ethanol spray	1	75	peri-wound	1
1	ethanol spray	1	75	peri-wound	1
1	ethanol spray	90	300	wound	2
1	ethanol spray	90	300	wound	1
1	ethanol spray	90	300	peri-wound	2
1	ethanol spray	90	300	peri-wound	2
1	ethanol spray	90	300	wound	1
1	ethanol spray	90	300	wound	2
1	ethanol spray	90	300	peri-wound	1
1	ethanol spray	90	300	peri-wound	1
1	ethanol spray	90	75	wound	2
1	ethanol spray	90	75	wound	1
1	ethanol spray	90	75	peri-wound	1
1	ethanol spray	90	75	peri-wound	1
1	ethanol spray	90	75	wound	1
1	ethanol spray	90	75	wound	1
1	ethanol spray	90	75	peri-wound	1
1	ethanol spray	90	75	peri-wound	1
1	ethanol spray	180	300	wound	3
1	ethanol spray	180	300	wound	3
1	ethanol spray	180	300	peri-wound	1
1	ethanol spray	180	300	peri-wound	1
1	ethanol spray	180	300	wound	1
1	ethanol spray	180	300	wound	3
1	ethanol spray	180	300	peri-wound	1
1	ethanol spray	180	300	peri-wound	1
1	ethanol spray	180	75	wound	4
1	ethanol spray	180	75	wound	3
1	ethanol spray	180	75	peri-wound	1
1	ethanol spray	180	75	peri-wound	2
1	ethanol spray	180	75	wound	2
1	ethanol spray	180	75	wound	1
1	ethanol spray	180	75	peri-wound	2
1	ethanol spray	180	75	peri-wound	1
2	ethanol spray	0	300	wound	1
2	ethanol spray	0	300	wound	1
2	ethanol spray	0	300	peri-wound	1
2	ethanol spray	0	300	peri-wound	1
2	ethanol spray	0	300	wound	1
2	ethanol spray	0	300	wound	1
2	ethanol spray	0	300	peri-wound	1
2	ethanol spray	0	300	peri-wound	1
2	ethanol spray	0	75	wound	1
2	ethanol spray	0	75	wound	1
2	ethanol spray	0	75	peri-wound	1
2	ethanol spray	0	75	peri-wound	1
2	ethanol spray	0	75	wound	1
2	ethanol spray	0	75	wound	1
2	ethanol spray	0	75	peri-wound	1
2	ethanol spray	0	75	peri-wound	1
2	ethanol spray	1	300	wound	1
2	ethanol spray	1	300	wound	1
2	ethanol spray	1	300	peri-wound	1
2	ethanol spray	1	300	peri-wound	1
2	ethanol spray	1	300	wound	1
2	ethanol spray	1	300	wound	1
2	ethanol spray	1	300	peri-wound	1
2	ethanol spray	1	300	peri-wound	1
2	ethanol spray	1	75	wound	1
2	ethanol spray	1	75	wound	1
2	ethanol spray	1	75	peri-wound	1
2	ethanol spray	1	75	peri-wound	1
2	ethanol spray	1	75	wound	1
2	ethanol spray	1	75	wound	1
2	ethanol spray	1	75	peri-wound	1
2	ethanol spray	1	75	peri-wound	1
2	ethanol spray	90	300	wound	2
2	ethanol spray	90	300	wound	1
2	ethanol spray	90	300	peri-wound	1
2	ethanol spray	90	300	peri-wound	1
2	ethanol spray	90	300	wound	1
2	ethanol spray	90	300	wound	1
2	ethanol spray	90	300	peri-wound	1
2	ethanol spray	90	300	peri-wound	1
2	ethanol spray	90	75	wound	1
2	ethanol spray	90	75	wound	1
2	ethanol spray	90	75	peri-wound	1
2	ethanol spray	90	75	peri-wound	1
2	ethanol spray	90	75	wound	1
2	ethanol spray	90	75	wound	1
2	ethanol spray	90	75	peri-wound	1
2	ethanol spray	90	75	peri-wound	1
2	ethanol spray	180	300	wound	1
2	ethanol spray	180	300	wound	1
2	ethanol spray	180	300	peri-wound	3
2	ethanol spray	180	300	peri-wound	1
2	ethanol spray	180	300	wound	2
2	ethanol spray	180	300	wound	2
2	ethanol spray	180	300	peri-wound	1
2	ethanol spray	180	300	peri-wound	2
2	ethanol spray	180	75	wound	4
2	ethanol spray	180	75	wound	1
2	ethanol spray	180	75	peri-wound	1
2	ethanol spray	180	75	peri-wound	2
2	ethanol spray	180	75	wound	1
2	ethanol spray	180	75	wound	1
2	ethanol spray	180	75	peri-wound	1
2	ethanol spray	180	75	peri-wound	1
3	ethanol spray	0	300	wound	1
3	ethanol spray	0	300	wound	1
3	ethanol spray	0	300	peri-wound	1
3	ethanol spray	0	300	peri-wound	1
3	ethanol spray	0	300	wound	1
3	ethanol spray	0	300	wound	1
3	ethanol spray	0	300	peri-wound	1
3	ethanol spray	0	300	peri-wound	1
3	ethanol spray	0	75	wound	1
3	ethanol spray	0	75	wound	2
3	ethanol spray	0	75	peri-wound	1
3	ethanol spray	0	75	peri-wound	1
3	ethanol spray	0	75	wound	1
3	ethanol spray	0	75	wound	1
3	ethanol spray	0	75	peri-wound	1
3	ethanol spray	0	75	peri-wound	1
3	ethanol spray	1	300	wound	1
3	ethanol spray	1	300	wound	1
3	ethanol spray	1	300	peri-wound	1
3	ethanol spray	1	300	peri-wound	1
3	ethanol spray	1	300	wound	1
3	ethanol spray	1	300	wound	1
3	ethanol spray	1	300	peri-wound	1
3	ethanol spray	1	300	peri-wound	1
3	ethanol spray	1	75	wound	1
3	ethanol spray	1	75	wound	1
3	ethanol spray	1	75	peri-wound	1
3	ethanol spray	1	75	peri-wound	1
3	ethanol spray	1	75	wound	1
3	ethanol spray	1	75	wound	1
3	ethanol spray	1	75	peri-wound	1
3	ethanol spray	1	75	peri-wound	1
3	ethanol spray	90	300	wound	2
3	ethanol spray	90	300	wound	2
3	ethanol spray	90	300	peri-wound	1
3	ethanol spray	90	300	peri-wound	2
3	ethanol spray	90	300	wound	1
3	ethanol spray	90	300	wound	1
3	ethanol spray	90	300	peri-wound	2
3	ethanol spray	90	300	peri-wound	1
3	ethanol spray	90	75	wound	2
3	ethanol spray	90	75	wound	2
3	ethanol spray	90	75	peri-wound	2
3	ethanol spray	90	75	peri-wound	1
3	ethanol spray	90	75	wound	2
3	ethanol spray	90	75	wound	1
3	ethanol spray	90	75	peri-wound	1
3	ethanol spray	90	75	peri-wound	1
3	ethanol spray	180	300	wound	2
3	ethanol spray	180	300	wound	2
3	ethanol spray	180	300	peri-wound	1
3	ethanol spray	180	300	peri-wound	1
3	ethanol spray	180	300	wound	2
3	ethanol spray	180	300	wound	2
3	ethanol spray	180	300	peri-wound	1
3	ethanol spray	180	300	peri-wound	1
3	ethanol spray	180	75	wound	3
3	ethanol spray	180	75	wound	2
3	ethanol spray	180	75	peri-wound	2
3	ethanol spray	180	75	peri-wound	2
3	ethanol spray	180	75	wound	3
3	ethanol spray	180	75	wound	1
3	ethanol spray	180	75	peri-wound	1
3	ethanol spray	180	75	peri-wound	2
4	ethanol spray	0	300	wound	2
4	ethanol spray	0	300	wound	1
4	ethanol spray	0	300	peri-wound	2
4	ethanol spray	0	300	peri-wound	1
4	ethanol spray	0	300	wound	2
4	ethanol spray	0	300	wound	2
4	ethanol spray	0	300	peri-wound	2
4	ethanol spray	0	300	peri-wound	2
4	ethanol spray	0	75	wound	2
4	ethanol spray	0	75	wound	1
4	ethanol spray	0	75	peri-wound	1
4	ethanol spray	0	75	peri-wound	1
4	ethanol spray	0	75	wound	1
4	ethanol spray	0	75	wound	1
4	ethanol spray	0	75	peri-wound	1
4	ethanol spray	0	75	peri-wound	1
4	ethanol spray	1	300	wound	1
4	ethanol spray	1	300	wound	2
4	ethanol spray	1	300	peri-wound	3
4	ethanol spray	1	300	peri-wound	1
4	ethanol spray	1	300	wound	3
4	ethanol spray	1	300	wound	2
4	ethanol spray	1	300	peri-wound	2
4	ethanol spray	1	300	peri-wound	2
4	ethanol spray	1	75	wound	4
4	ethanol spray	1	75	wound	3
4	ethanol spray	1	75	peri-wound	1
4	ethanol spray	1	75	peri-wound	2
4	ethanol spray	1	75	wound	1
4	ethanol spray	1	75	wound	4
4	ethanol spray	1	75	peri-wound	1
4	ethanol spray	1	75	peri-wound	2
4	ethanol spray	90	300	wound	4
4	ethanol spray	90	300	wound	3
4	ethanol spray	90	300	peri-wound	4
4	ethanol spray	90	300	peri-wound	3
4	ethanol spray	90	300	wound	3
4	ethanol spray	90	300	wound	3
4	ethanol spray	90	300	peri-wound	2
4	ethanol spray	90	300	peri-wound	2
4	ethanol spray	90	75	wound	4
4	ethanol spray	90	75	wound	4
4	ethanol spray	90	75	peri-wound	2
4	ethanol spray	90	75	peri-wound	3
4	ethanol spray	90	75	wound	3
4	ethanol spray	90	75	wound	3
4	ethanol spray	90	75	peri-wound	2
4	ethanol spray	90	75	peri-wound	2
4	ethanol spray	180	300	wound	4
4	ethanol spray	180	300	wound	4
4	ethanol spray	180	300	peri-wound	2
4	ethanol spray	180	300	peri-wound	3
4	ethanol spray	180	300	wound	4
4	ethanol spray	180	300	wound	3
4	ethanol spray	180	300	peri-wound	3
4	ethanol spray	180	300	peri-wound	2
4	ethanol spray	180	75	wound	3
4	ethanol spray	180	75	wound	4
4	ethanol spray	180	75	peri-wound	3
4	ethanol spray	180	75	peri-wound	2
4	ethanol spray	180	75	wound	3
4	ethanol spray	180	75	wound	3
4	ethanol spray	180	75	peri-wound	2
4	ethanol spray	180	75	peri-wound	2
5	ethanol spray	0	300	wound	2
5	ethanol spray	0	300	wound	3
5	ethanol spray	0	300	peri-wound	4
5	ethanol spray	0	300	peri-wound	1
5	ethanol spray	0	300	wound	4
5	ethanol spray	0	300	wound	3
5	ethanol spray	0	300	peri-wound	3
5	ethanol spray	0	300	peri-wound	3
5	ethanol spray	0	75	wound	1
5	ethanol spray	0	75	wound	1
5	ethanol spray	0	75	peri-wound	1
5	ethanol spray	0	75	peri-wound	1
5	ethanol spray	0	75	wound	3
5	ethanol spray	0	75	wound	3
5	ethanol spray	0	75	peri-wound	1
5	ethanol spray	0	75	peri-wound	2
5	ethanol spray	1	300	wound	3
5	ethanol spray	1	300	wound	3
5	ethanol spray	1	300	peri-wound	1
5	ethanol spray	1	300	peri-wound	4
5	ethanol spray	1	300	wound	3
5	ethanol spray	1	300	wound	3
5	ethanol spray	1	300	peri-wound	3
5	ethanol spray	1	300	peri-wound	3
5	ethanol spray	1	75	wound	2
5	ethanol spray	1	75	wound	3
5	ethanol spray	1	75	peri-wound	1
5	ethanol spray	1	75	peri-wound	3
5	ethanol spray	1	75	wound	3
5	ethanol spray	1	75	wound	1
5	ethanol spray	1	75	peri-wound	1
5	ethanol spray	1	75	peri-wound	3
5	ethanol spray	90	300	wound	2
5	ethanol spray	90	300	wound	2
5	ethanol spray	90	300	peri-wound	1
5	ethanol spray	90	300	peri-wound	1
5	ethanol spray	90	300	wound	2
5	ethanol spray	90	300	wound	2
5	ethanol spray	90	300	peri-wound	2
5	ethanol spray	90	300	peri-wound	2
5	ethanol spray	90	75	wound	3
5	ethanol spray	90	75	wound	2
5	ethanol spray	90	75	peri-wound	2
5	ethanol spray	90	75	peri-wound	2
5	ethanol spray	90	75	wound	2
5	ethanol spray	90	75	wound	2
5	ethanol spray	90	75	peri-wound	2
5	ethanol spray	90	75	peri-wound	2
5	ethanol spray	180	300	wound	2
5	ethanol spray	180	300	wound	2
5	ethanol spray	180	300	peri-wound	1
5	ethanol spray	180	300	peri-wound	1
5	ethanol spray	180	300	wound	1
5	ethanol spray	180	300	wound	2
5	ethanol spray	180	300	peri-wound	2
5	ethanol spray	180	300	peri-wound	1
5	ethanol spray	180	75	wound	1
5	ethanol spray	180	75	wound	2
5	ethanol spray	180	75	peri-wound	2
5	ethanol spray	180	75	peri-wound	2
5	ethanol spray	180	75	wound	2
5	ethanol spray	180	75	wound	2
5	ethanol spray	180	75	peri-wound	1
5	ethanol spray	180	75	peri-wound	2
6	ethanol spray	0	300	wound	1
6	ethanol spray	0	300	wound	1
6	ethanol spray	0	300	peri-wound	1
6	ethanol spray	0	300	peri-wound	1
6	ethanol spray	0	300	wound	1
6	ethanol spray	0	300	wound	2
6	ethanol spray	0	300	peri-wound	1
6	ethanol spray	0	300	peri-wound	1
6	ethanol spray	0	75	wound	1
6	ethanol spray	0	75	wound	1
6	ethanol spray	0	75	peri-wound	1
6	ethanol spray	0	75	peri-wound	1
6	ethanol spray	0	75	wound	2
6	ethanol spray	0	75	wound	1
6	ethanol spray	0	75	peri-wound	1
6	ethanol spray	0	75	peri-wound	1
6	ethanol spray	1	300	wound	1
6	ethanol spray	1	300	wound	1
6	ethanol spray	1	300	peri-wound	1
6	ethanol spray	1	300	peri-wound	1
6	ethanol spray	1	300	wound	1
6	ethanol spray	1	300	wound	1
6	ethanol spray	1	300	peri-wound	1
6	ethanol spray	1	300	peri-wound	1
6	ethanol spray	1	75	wound	1
6	ethanol spray	1	75	wound	1
6	ethanol spray	1	75	peri-wound	1
6	ethanol spray	1	75	peri-wound	1
6	ethanol spray	1	75	wound	3
6	ethanol spray	1	75	wound	1
6	ethanol spray	1	75	peri-wound	1
6	ethanol spray	1	75	peri-wound	1
6	ethanol spray	90	300	wound	1
6	ethanol spray	90	300	wound	2
6	ethanol spray	90	300	peri-wound	1
6	ethanol spray	90	300	peri-wound	1
6	ethanol spray	90	300	wound	2
6	ethanol spray	90	300	wound	2
6	ethanol spray	90	300	peri-wound	3
6	ethanol spray	90	300	peri-wound	1
6	ethanol spray	90	75	wound	1
6	ethanol spray	90	75	wound	1
6	ethanol spray	90	75	peri-wound	1
6	ethanol spray	90	75	peri-wound	1
6	ethanol spray	90	75	wound	1
6	ethanol spray	90	75	wound	2
6	ethanol spray	90	75	peri-wound	1
6	ethanol spray	90	75	peri-wound	2
6	ethanol spray	180	300	wound	1
6	ethanol spray	180	300	wound	3
6	ethanol spray	180	300	peri-wound	1
6	ethanol spray	180	300	peri-wound	1
6	ethanol spray	180	300	wound	1
6	ethanol spray	180	300	wound	4
6	ethanol spray	180	300	peri-wound	1
6	ethanol spray	180	300	peri-wound	3
6	ethanol spray	180	75	wound	1
6	ethanol spray	180	75	wound	4
6	ethanol spray	180	75	peri-wound	1
6	ethanol spray	180	75	peri-wound	1
6	ethanol spray	180	75	wound	3
6	ethanol spray	180	75	wound	3
6	ethanol spray	180	75	peri-wound	1
6	ethanol spray	180	75	peri-wound	3
7	ethanol spray	0	300	wound	1
7	ethanol spray	0	300	wound	2
7	ethanol spray	0	300	peri-wound	1
7	ethanol spray	0	300	peri-wound	1
7	ethanol spray	0	300	wound	1
7	ethanol spray	0	300	wound	2
7	ethanol spray	0	300	peri-wound	2
7	ethanol spray	0	300	peri-wound	1
7	ethanol spray	0	75	wound	1
7	ethanol spray	0	75	wound	2
7	ethanol spray	0	75	peri-wound	1
7	ethanol spray	0	75	peri-wound	1
7	ethanol spray	0	75	wound	2
7	ethanol spray	0	75	wound	1
7	ethanol spray	0	75	peri-wound	1
7	ethanol spray	0	75	peri-wound	1
7	ethanol spray	1	300	wound	1
7	ethanol spray	1	300	wound	1
7	ethanol spray	1	300	peri-wound	1
7	ethanol spray	1	300	peri-wound	1
7	ethanol spray	1	300	wound	1
7	ethanol spray	1	300	wound	1
7	ethanol spray	1	300	peri-wound	1
7	ethanol spray	1	300	peri-wound	1
7	ethanol spray	1	75	wound	1
7	ethanol spray	1	75	wound	1
7	ethanol spray	1	75	peri-wound	1
7	ethanol spray	1	75	peri-wound	1
7	ethanol spray	1	75	wound	1
7	ethanol spray	1	75	wound	1
7	ethanol spray	1	75	peri-wound	1
7	ethanol spray	1	75	peri-wound	1
7	ethanol spray	90	300	wound	2
7	ethanol spray	90	300	wound	2
7	ethanol spray	90	300	peri-wound	1
7	ethanol spray	90	300	peri-wound	2
7	ethanol spray	90	300	wound	2
7	ethanol spray	90	300	wound	1
7	ethanol spray	90	300	peri-wound	2
7	ethanol spray	90	300	peri-wound	2
7	ethanol spray	90	75	wound	3
7	ethanol spray	90	75	wound	3
7	ethanol spray	90	75	peri-wound	2
7	ethanol spray	90	75	peri-wound	2
7	ethanol spray	90	75	wound	2
7	ethanol spray	90	75	wound	1
7	ethanol spray	90	75	peri-wound	2
7	ethanol spray	90	75	peri-wound	1
7	ethanol spray	180	300	wound	2
7	ethanol spray	180	300	wound	2
7	ethanol spray	180	300	peri-wound	1
7	ethanol spray	180	300	peri-wound	2
7	ethanol spray	180	300	wound	2
7	ethanol spray	180	300	wound	1
7	ethanol spray	180	300	peri-wound	2
7	ethanol spray	180	300	peri-wound	2
7	ethanol spray	180	75	wound	3
7	ethanol spray	180	75	wound	3
7	ethanol spray	180	75	peri-wound	2
7	ethanol spray	180	75	peri-wound	2
7	ethanol spray	180	75	wound	2
7	ethanol spray	180	75	wound	1
7	ethanol spray	180	75	peri-wound	2
7	ethanol spray	180	75	peri-wound	1
8	ethanol spray	0	300	wound	1
8	ethanol spray	0	300	wound	2
8	ethanol spray	0	300	peri-wound	1
8	ethanol spray	0	300	peri-wound	1
8	ethanol spray	0	300	wound	2
8	ethanol spray	0	300	wound	1
8	ethanol spray	0	300	peri-wound	1
8	ethanol spray	0	300	peri-wound	1
8	ethanol spray	0	75	wound	1
8	ethanol spray	0	75	wound	2
8	ethanol spray	0	75	peri-wound	1
8	ethanol spray	0	75	peri-wound	1
8	ethanol spray	0	75	wound	1
8	ethanol spray	0	75	wound	1
8	ethanol spray	0	75	peri-wound	1
8	ethanol spray	0	75	peri-wound	1
8	ethanol spray	1	300	wound	1
8	ethanol spray	1	300	wound	1
8	ethanol spray	1	300	peri-wound	1
8	ethanol spray	1	300	peri-wound	1
8	ethanol spray	1	300	wound	1
8	ethanol spray	1	300	wound	1
8	ethanol spray	1	300	peri-wound	1
8	ethanol spray	1	300	peri-wound	1
8	ethanol spray	1	75	wound	2
8	ethanol spray	1	75	wound	1
8	ethanol spray	1	75	peri-wound	1
8	ethanol spray	1	75	peri-wound	1
8	ethanol spray	1	75	wound	2
8	ethanol spray	1	75	wound	1
8	ethanol spray	1	75	peri-wound	1
8	ethanol spray	1	75	peri-wound	1
8	ethanol spray	90	300	wound	1
8	ethanol spray	90	300	wound	2
8	ethanol spray	90	300	peri-wound	1
8	ethanol spray	90	300	peri-wound	1
8	ethanol spray	90	300	wound	1
8	ethanol spray	90	300	wound	1
8	ethanol spray	90	300	peri-wound	1
8	ethanol spray	90	300	peri-wound	1
8	ethanol spray	90	75	wound	2
8	ethanol spray	90	75	wound	2
8	ethanol spray	90	75	peri-wound	1
8	ethanol spray	90	75	peri-wound	1
8	ethanol spray	90	75	wound	2
8	ethanol spray	90	75	wound	1
8	ethanol spray	90	75	peri-wound	3
8	ethanol spray	90	75	peri-wound	1
8	ethanol spray	180	300	wound	2
8	ethanol spray	180	300	wound	1
8	ethanol spray	180	300	peri-wound	1
8	ethanol spray	180	300	peri-wound	1
8	ethanol spray	180	300	wound	1
8	ethanol spray	180	300	wound	1
8	ethanol spray	180	300	peri-wound	1
8	ethanol spray	180	300	peri-wound	1
8	ethanol spray	180	75	wound	2
8	ethanol spray	180	75	wound	1
8	ethanol spray	180	75	peri-wound	1
8	ethanol spray	180	75	peri-wound	1
8	ethanol spray	180	75	wound	2
8	ethanol spray	180	75	wound	1
8	ethanol spray	180	75	peri-wound	2
8	ethanol spray	180	75	peri-wound	1
9	ethanol spray	0	300	wound	2
9	ethanol spray	0	300	wound	2
9	ethanol spray	0	300	peri-wound	1
9	ethanol spray	0	300	peri-wound	2
9	ethanol spray	0	300	wound	1
9	ethanol spray	0	300	wound	2
9	ethanol spray	0	300	peri-wound	1
9	ethanol spray	0	300	peri-wound	1
9	ethanol spray	0	75	wound	2
9	ethanol spray	0	75	wound	2
9	ethanol spray	0	75	peri-wound	1
9	ethanol spray	0	75	peri-wound	2
9	ethanol spray	0	75	wound	2
9	ethanol spray	0	75	wound	2
9	ethanol spray	0	75	peri-wound	1
9	ethanol spray	0	75	peri-wound	1
9	ethanol spray	1	300	wound	2
9	ethanol spray	1	300	wound	1
9	ethanol spray	1	300	peri-wound	1
9	ethanol spray	1	300	peri-wound	2
9	ethanol spray	1	300	wound	1
9	ethanol spray	1	300	wound	1
9	ethanol spray	1	300	peri-wound	1
9	ethanol spray	1	300	peri-wound	1
9	ethanol spray	1	75	wound	4
9	ethanol spray	1	75	wound	1
9	ethanol spray	1	75	peri-wound	2
9	ethanol spray	1	75	peri-wound	2
9	ethanol spray	1	75	wound	1
9	ethanol spray	1	75	wound	2
9	ethanol spray	1	75	peri-wound	1
9	ethanol spray	1	75	peri-wound	1
9	ethanol spray	90	300	wound	2
9	ethanol spray	90	300	wound	2
9	ethanol spray	90	300	peri-wound	2
9	ethanol spray	90	300	peri-wound	2
9	ethanol spray	90	300	wound	2
9	ethanol spray	90	300	wound	1
9	ethanol spray	90	300	peri-wound	1
9	ethanol spray	90	300	peri-wound	2
9	ethanol spray	90	75	wound	2
9	ethanol spray	90	75	wound	2
9	ethanol spray	90	75	peri-wound	1
9	ethanol spray	90	75	peri-wound	2
9	ethanol spray	90	75	wound	2
9	ethanol spray	90	75	wound	1
9	ethanol spray	90	75	peri-wound	1
9	ethanol spray	90	75	peri-wound	1
9	ethanol spray	180	300	wound	2
9	ethanol spray	180	300	wound	2
9	ethanol spray	180	300	peri-wound	2
9	ethanol spray	180	300	peri-wound	2
9	ethanol spray	180	300	wound	1
9	ethanol spray	180	300	wound	1
9	ethanol spray	180	300	peri-wound	1
9	ethanol spray	180	300	peri-wound	1
9	ethanol spray	180	75	wound	2
9	ethanol spray	180	75	wound	2
9	ethanol spray	180	75	peri-wound	3
9	ethanol spray	180	75	peri-wound	2
9	ethanol spray	180	75	wound	1
9	ethanol spray	180	75	wound	2
9	ethanol spray	180	75	peri-wound	1
9	ethanol spray	180	75	peri-wound	1
10	ethanol spray	0	300	wound	1
10	ethanol spray	0	300	wound	1
10	ethanol spray	0	300	peri-wound	1
10	ethanol spray	0	300	peri-wound	1
10	ethanol spray	0	300	wound	1
10	ethanol spray	0	300	wound	1
10	ethanol spray	0	300	peri-wound	1
10	ethanol spray	0	300	peri-wound	1
10	ethanol spray	0	75	wound	2
10	ethanol spray	0	75	wound	1
10	ethanol spray	0	75	peri-wound	1
10	ethanol spray	0	75	peri-wound	1
10	ethanol spray	0	75	wound	1
10	ethanol spray	0	75	wound	1
10	ethanol spray	0	75	peri-wound	1
10	ethanol spray	0	75	peri-wound	1
10	ethanol spray	1	300	wound	2
10	ethanol spray	1	300	wound	1
10	ethanol spray	1	300	peri-wound	1
10	ethanol spray	1	300	peri-wound	1
10	ethanol spray	1	300	wound	2
10	ethanol spray	1	300	wound	1
10	ethanol spray	1	300	peri-wound	1
10	ethanol spray	1	300	peri-wound	1
10	ethanol spray	1	75	wound	2
10	ethanol spray	1	75	wound	1
10	ethanol spray	1	75	peri-wound	1
10	ethanol spray	1	75	peri-wound	1
10	ethanol spray	1	75	wound	1
10	ethanol spray	1	75	wound	1
10	ethanol spray	1	75	peri-wound	1
10	ethanol spray	1	75	peri-wound	1
10	ethanol spray	90	300	wound	1
10	ethanol spray	90	300	wound	2
10	ethanol spray	90	300	peri-wound	1
10	ethanol spray	90	300	peri-wound	1
10	ethanol spray	90	300	wound	1
10	ethanol spray	90	300	wound	2
10	ethanol spray	90	300	peri-wound	1
10	ethanol spray	90	300	peri-wound	1
10	ethanol spray	90	75	wound	3
10	ethanol spray	90	75	wound	1
10	ethanol spray	90	75	peri-wound	3
10	ethanol spray	90	75	peri-wound	1
10	ethanol spray	90	75	wound	1
10	ethanol spray	90	75	wound	1
10	ethanol spray	90	75	peri-wound	1
10	ethanol spray	90	75	peri-wound	1
10	ethanol spray	180	300	wound	3
10	ethanol spray	180	300	wound	1
10	ethanol spray	180	300	peri-wound	1
10	ethanol spray	180	300	peri-wound	1
10	ethanol spray	180	300	wound	1
10	ethanol spray	180	300	wound	3
10	ethanol spray	180	300	peri-wound	1
10	ethanol spray	180	300	peri-wound	1
10	ethanol spray	180	75	wound	3
10	ethanol spray	180	75	wound	2
10	ethanol spray	180	75	peri-wound	1
10	ethanol spray	180	75	peri-wound	1
10	ethanol spray	180	75	wound	1
10	ethanol spray	180	75	wound	4
10	ethanol spray	180	75	peri-wound	2
10	ethanol spray	180	75	peri-wound	2
11	ethanol spray	0	300	wound	1
11	ethanol spray	0	300	wound	1
11	ethanol spray	0	300	peri-wound	1
11	ethanol spray	0	300	peri-wound	2
11	ethanol spray	0	300	wound	1
11	ethanol spray	0	300	wound	1
11	ethanol spray	0	300	peri-wound	1
11	ethanol spray	0	300	peri-wound	1
11	ethanol spray	0	75	wound	2
11	ethanol spray	0	75	wound	1
11	ethanol spray	0	75	peri-wound	2
11	ethanol spray	0	75	peri-wound	1
11	ethanol spray	0	75	wound	2
11	ethanol spray	0	75	wound	1
11	ethanol spray	0	75	peri-wound	2
11	ethanol spray	0	75	peri-wound	2
11	ethanol spray	1	300	wound	1
11	ethanol spray	1	300	wound	1
11	ethanol spray	1	300	peri-wound	1
11	ethanol spray	1	300	peri-wound	1
11	ethanol spray	1	300	wound	1
11	ethanol spray	1	300	wound	1
11	ethanol spray	1	300	peri-wound	1
11	ethanol spray	1	300	peri-wound	1
11	ethanol spray	1	75	wound	1
11	ethanol spray	1	75	wound	1
11	ethanol spray	1	75	peri-wound	1
11	ethanol spray	1	75	peri-wound	1
11	ethanol spray	1	75	wound	1
11	ethanol spray	1	75	wound	1
11	ethanol spray	1	75	peri-wound	1
11	ethanol spray	1	75	peri-wound	1
11	ethanol spray	90	300	wound	1
11	ethanol spray	90	300	wound	1
11	ethanol spray	90	300	peri-wound	1
11	ethanol spray	90	300	peri-wound	2
11	ethanol spray	90	300	wound	2
11	ethanol spray	90	300	wound	2
11	ethanol spray	90	300	peri-wound	1
11	ethanol spray	90	300	peri-wound	1
11	ethanol spray	90	75	wound	2
11	ethanol spray	90	75	wound	1
11	ethanol spray	90	75	peri-wound	1
11	ethanol spray	90	75	peri-wound	1
11	ethanol spray	90	75	wound	2
11	ethanol spray	90	75	wound	1
11	ethanol spray	90	75	peri-wound	1
11	ethanol spray	90	75	peri-wound	1
11	ethanol spray	180	300	wound	1
11	ethanol spray	180	300	wound	1
11	ethanol spray	180	300	peri-wound	1
11	ethanol spray	180	300	peri-wound	1
11	ethanol spray	180	300	wound	1
11	ethanol spray	180	300	wound	1
11	ethanol spray	180	300	peri-wound	1
11	ethanol spray	180	300	peri-wound	1
11	ethanol spray	180	75	wound	3
11	ethanol spray	180	75	wound	2
11	ethanol spray	180	75	peri-wound	1
11	ethanol spray	180	75	peri-wound	1
11	ethanol spray	180	75	wound	1
11	ethanol spray	180	75	wound	1
11	ethanol spray	180	75	peri-wound	1
11	ethanol spray	180	75	peri-wound	1
12	powder	0	300	wound	2
12	powder	0	300	wound	3
12	powder	0	300	peri-wound	3
12	powder	0	300	peri-wound	3
12	powder	0	300	wound	3
12	powder	0	300	wound	3
12	powder	0	300	peri-wound	3
12	powder	0	300	peri-wound	2
12	powder	0	75	wound	3
12	powder	0	75	wound	3
12	powder	0	75	peri-wound	2
12	powder	0	75	peri-wound	2
12	powder	0	75	wound	2
12	powder	0	75	wound	2
12	powder	0	75	peri-wound	3
12	powder	0	75	peri-wound	3
12	powder	1	300	wound	1
12	powder	1	300	wound	1
12	powder	1	300	peri-wound	1
12	powder	1	300	peri-wound	1
12	powder	1	300	wound	2
12	powder	1	300	wound	1
12	powder	1	300	peri-wound	2
12	powder	1	300	peri-wound	2
12	powder	1	75	wound	1
12	powder	1	75	wound	1
12	powder	1	75	peri-wound	1
12	powder	1	75	peri-wound	1
12	powder	1	75	wound	1
12	powder	1	75	wound	1
12	powder	1	75	peri-wound	1
12	powder	1	75	peri-wound	1
12	powder	90	300	wound	4
12	powder	90	300	wound	4
12	powder	90	300	peri-wound	4
12	powder	90	300	peri-wound	4
12	powder	90	300	wound	4
12	powder	90	300	wound	4
12	powder	90	300	peri-wound	3
12	powder	90	300	peri-wound	3
12	powder	90	75	wound	4
12	powder	90	75	wound	4
12	powder	90	75	peri-wound	4
12	powder	90	75	peri-wound	4
12	powder	90	75	wound	4
12	powder	90	75	wound	4
12	powder	90	75	peri-wound	3
12	powder	90	75	peri-wound	3
12	powder	180	300	wound	4
12	powder	180	300	wound	3
12	powder	180	300	peri-wound	3
12	powder	180	300	peri-wound	3
12	powder	180	300	wound	4
12	powder	180	300	wound	3
12	powder	180	300	peri-wound	2
12	powder	180	300	peri-wound	2
12	powder	180	75	wound	4
12	powder	180	75	wound	4
12	powder	180	75	peri-wound	4
12	powder	180	75	peri-wound	4
12	powder	180	75	wound	3
12	powder	180	75	wound	3
12	powder	180	75	peri-wound	3
12	powder	180	75	peri-wound	3
13	powder	0	300	wound	1
13	powder	0	300	wound	2
13	powder	0	300	peri-wound	1
13	powder	0	300	peri-wound	2
13	powder	0	300	wound	1
13	powder	0	300	wound	1
13	powder	0	300	peri-wound	1
13	powder	0	300	peri-wound	1
13	powder	0	75	wound	1
13	powder	0	75	wound	1
13	powder	0	75	peri-wound	2
13	powder	0	75	peri-wound	1
13	powder	0	75	wound	1
13	powder	0	75	wound	1
13	powder	0	75	peri-wound	1
13	powder	0	75	peri-wound	1
13	powder	1	300	wound	3
13	powder	1	300	wound	1
13	powder	1	300	peri-wound	3
13	powder	1	300	peri-wound	3
13	powder	1	300	wound	1
13	powder	1	300	wound	1
13	powder	1	300	peri-wound	2
13	powder	1	300	peri-wound	1
13	powder	1	75	wound	1
13	powder	1	75	wound	1
13	powder	1	75	peri-wound	1
13	powder	1	75	peri-wound	1
13	powder	1	75	wound	2
13	powder	1	75	wound	1
13	powder	1	75	peri-wound	1
13	powder	1	75	peri-wound	1
13	powder	90	300	wound	1
13	powder	90	300	wound	4
13	powder	90	300	peri-wound	4
13	powder	90	300	peri-wound	4
13	powder	90	300	wound	4
13	powder	90	300	wound	2
13	powder	90	300	peri-wound	4
13	powder	90	300	peri-wound	1
13	powder	90	75	wound	3
13	powder	90	75	wound	3
13	powder	90	75	peri-wound	4
13	powder	90	75	peri-wound	4
13	powder	90	75	wound	3
13	powder	90	75	wound	3
13	powder	90	75	peri-wound	3
13	powder	90	75	peri-wound	1
13	powder	180	300	wound	4
13	powder	180	300	wound	4
13	powder	180	300	peri-wound	4
13	powder	180	300	peri-wound	4
13	powder	180	300	wound	3
13	powder	180	300	wound	3
13	powder	180	300	peri-wound	4
13	powder	180	300	peri-wound	3
13	powder	180	75	wound	4
13	powder	180	75	wound	3
13	powder	180	75	peri-wound	1
13	powder	180	75	peri-wound	3
13	powder	180	75	wound	4
13	powder	180	75	wound	4
13	powder	180	75	peri-wound	4
13	powder	180	75	peri-wound	4
14	powder	0	300	wound	1
14	powder	0	300	wound	1
14	powder	0	300	peri-wound	1
14	powder	0	300	peri-wound	1
14	powder	0	300	wound	1
14	powder	0	300	wound	1
14	powder	0	300	peri-wound	1
14	powder	0	300	peri-wound	2
14	powder	0	75	wound	1
14	powder	0	75	wound	1
14	powder	0	75	peri-wound	1
14	powder	0	75	peri-wound	1
14	powder	0	75	wound	1
14	powder	0	75	wound	2
14	powder	0	75	peri-wound	1
14	powder	0	75	peri-wound	1
14	powder	1	300	wound	2
14	powder	1	300	wound	1
14	powder	1	300	peri-wound	1
14	powder	1	300	peri-wound	2
14	powder	1	300	wound	1
14	powder	1	300	wound	1
14	powder	1	300	peri-wound	1
14	powder	1	300	peri-wound	1
14	powder	1	75	wound	2
14	powder	1	75	wound	1
14	powder	1	75	peri-wound	1
14	powder	1	75	peri-wound	1
14	powder	1	75	wound	2
14	powder	1	75	wound	1
14	powder	1	75	peri-wound	1
14	powder	1	75	peri-wound	1
14	powder	90	300	wound	2
14	powder	90	300	wound	2
14	powder	90	300	peri-wound	2
14	powder	90	300	peri-wound	2
14	powder	90	300	wound	2
14	powder	90	300	wound	1
14	powder	90	300	peri-wound	1
14	powder	90	300	peri-wound	1
14	powder	90	75	wound	3
14	powder	90	75	wound	3
14	powder	90	75	peri-wound	2
14	powder	90	75	peri-wound	1
14	powder	90	75	wound	2
14	powder	90	75	wound	1
14	powder	90	75	peri-wound	2
14	powder	90	75	peri-wound	1
14	powder	180	300	wound	4
14	powder	180	300	wound	4
14	powder	180	300	peri-wound	4
14	powder	180	300	peri-wound	1
14	powder	180	300	wound	1
14	powder	180	300	wound	3
14	powder	180	300	peri-wound	1
14	powder	180	300	peri-wound	2
14	powder	180	75	wound	4
14	powder	180	75	wound	4
14	powder	180	75	peri-wound	3
14	powder	180	75	peri-wound	3
14	powder	180	75	wound	4
14	powder	180	75	wound	1
14	powder	180	75	peri-wound	1
14	powder	180	75	peri-wound	3
15	powder	0	300	wound	3
15	powder	0	300	wound	2
15	powder	0	300	peri-wound	1
15	powder	0	300	peri-wound	1
15	powder	0	300	wound	1
15	powder	0	300	wound	1
15	powder	0	300	peri-wound	1
15	powder	0	300	peri-wound	2
15	powder	0	75	wound	3
15	powder	0	75	wound	2
15	powder	0	75	peri-wound	2
15	powder	0	75	peri-wound	1
15	powder	0	75	wound	1
15	powder	0	75	wound	1
15	powder	0	75	peri-wound	1
15	powder	0	75	peri-wound	1
15	powder	1	300	wound	3
15	powder	1	300	wound	4
15	powder	1	300	peri-wound	3
15	powder	1	300	peri-wound	4
15	powder	1	300	wound	2
15	powder	1	300	wound	1
15	powder	1	300	peri-wound	1
15	powder	1	300	peri-wound	2
15	powder	1	75	wound	1
15	powder	1	75	wound	1
15	powder	1	75	peri-wound	2
15	powder	1	75	peri-wound	1
15	powder	1	75	wound	1
15	powder	1	75	wound	1
15	powder	1	75	peri-wound	1
15	powder	1	75	peri-wound	1
15	powder	90	300	wound	4
15	powder	90	300	wound	4
15	powder	90	300	peri-wound	4
15	powder	90	300	peri-wound	2
15	powder	90	300	wound	3
15	powder	90	300	wound	3
15	powder	90	300	peri-wound	3
15	powder	90	300	peri-wound	1
15	powder	90	75	wound	4
15	powder	90	75	wound	3
15	powder	90	75	peri-wound	3
15	powder	90	75	peri-wound	4
15	powder	90	75	wound	4
15	powder	90	75	wound	4
15	powder	90	75	peri-wound	4
15	powder	90	75	peri-wound	2
15	powder	180	300	wound	3
15	powder	180	300	wound	3
15	powder	180	300	peri-wound	3
15	powder	180	300	peri-wound	3
15	powder	180	300	wound	3
15	powder	180	300	wound	3
15	powder	180	300	peri-wound	3
15	powder	180	300	peri-wound	3
15	powder	180	75	wound	4
15	powder	180	75	wound	4
15	powder	180	75	peri-wound	4
15	powder	180	75	peri-wound	3
15	powder	180	75	wound	3
15	powder	180	75	wound	4
15	powder	180	75	peri-wound	3
15	powder	180	75	peri-wound	3
16	powder	0	300	wound	1
16	powder	0	300	wound	1
16	powder	0	300	peri-wound	1
16	powder	0	300	peri-wound	1
16	powder	0	300	wound	1
16	powder	0	300	wound	1
16	powder	0	300	peri-wound	1
16	powder	0	300	peri-wound	2
16	powder	0	75	wound	1
16	powder	0	75	wound	1
16	powder	0	75	peri-wound	1
16	powder	0	75	peri-wound	1
16	powder	0	75	wound	1
16	powder	0	75	wound	1
16	powder	0	75	peri-wound	1
16	powder	0	75	peri-wound	1
16	powder	1	300	wound	2
16	powder	1	300	wound	1
16	powder	1	300	peri-wound	1
16	powder	1	300	peri-wound	1
16	powder	1	300	wound	1
16	powder	1	300	wound	1
16	powder	1	300	peri-wound	1
16	powder	1	300	peri-wound	1
16	powder	1	75	wound	2
16	powder	1	75	wound	2
16	powder	1	75	peri-wound	1
16	powder	1	75	peri-wound	1
16	powder	1	75	wound	1
16	powder	1	75	wound	1
16	powder	1	75	peri-wound	1
16	powder	1	75	peri-wound	2
16	powder	90	300	wound	3
16	powder	90	300	wound	3
16	powder	90	300	peri-wound	3
16	powder	90	300	peri-wound	3
16	powder	90	300	wound	3
16	powder	90	300	wound	3
16	powder	90	300	peri-wound	1
16	powder	90	300	peri-wound	2
16	powder	90	75	wound	1
16	powder	90	75	wound	2
16	powder	90	75	peri-wound	1
16	powder	90	75	peri-wound	1
16	powder	90	75	wound	2
16	powder	90	75	wound	1
16	powder	90	75	peri-wound	1
16	powder	90	75	peri-wound	2
16	powder	180	300	wound	3
16	powder	180	300	wound	2
16	powder	180	300	peri-wound	1
16	powder	180	300	peri-wound	3
16	powder	180	300	wound	3
16	powder	180	300	wound	3
16	powder	180	300	peri-wound	1
16	powder	180	300	peri-wound	3
16	powder	180	75	wound	4
16	powder	180	75	wound	3
16	powder	180	75	peri-wound	1
16	powder	180	75	peri-wound	1
16	powder	180	75	wound	1
16	powder	180	75	wound	4
16	powder	180	75	peri-wound	1
16	powder	180	75	peri-wound	1
17	powder	0	300	wound	2
17	powder	0	300	wound	1
17	powder	0	300	peri-wound	1
17	powder	0	300	peri-wound	1
17	powder	0	300	wound	1
17	powder	0	300	wound	2
17	powder	0	300	peri-wound	1
17	powder	0	300	peri-wound	1
17	powder	0	75	wound	1
17	powder	0	75	wound	1
17	powder	0	75	peri-wound	1
17	powder	0	75	peri-wound	1
17	powder	0	75	wound	1
17	powder	0	75	wound	1
17	powder	0	75	peri-wound	1
17	powder	0	75	peri-wound	1
17	powder	1	300	wound	1
17	powder	1	300	wound	2
17	powder	1	300	peri-wound	1
17	powder	1	300	peri-wound	1
17	powder	1	300	wound	1
17	powder	1	300	wound	1
17	powder	1	300	peri-wound	1
17	powder	1	300	peri-wound	1
17	powder	1	75	wound	1
17	powder	1	75	wound	1
17	powder	1	75	peri-wound	1
17	powder	1	75	peri-wound	1
17	powder	1	75	wound	1
17	powder	1	75	wound	1
17	powder	1	75	peri-wound	1
17	powder	1	75	peri-wound	1
17	powder	90	300	wound	2
17	powder	90	300	wound	1
17	powder	90	300	peri-wound	1
17	powder	90	300	peri-wound	1
17	powder	90	300	wound	1
17	powder	90	300	wound	1
17	powder	90	300	peri-wound	1
17	powder	90	300	peri-wound	1
17	powder	90	75	wound	1
17	powder	90	75	wound	1
17	powder	90	75	peri-wound	1
17	powder	90	75	peri-wound	1
17	powder	90	75	wound	1
17	powder	90	75	wound	1
17	powder	90	75	peri-wound	1
17	powder	90	75	peri-wound	1
17	powder	180	300	wound	4
17	powder	180	300	wound	4
17	powder	180	300	peri-wound	3
17	powder	180	300	peri-wound	1
17	powder	180	300	wound	3
17	powder	180	300	wound	4
17	powder	180	300	peri-wound	2
17	powder	180	300	peri-wound	2
17	powder	180	75	wound	3
17	powder	180	75	wound	4
17	powder	180	75	peri-wound	1
17	powder	180	75	peri-wound	2
17	powder	180	75	wound	4
17	powder	180	75	wound	1
17	powder	180	75	peri-wound	4
17	powder	180	75	peri-wound	1
18	powder	0	300	wound	4
18	powder	0	300	wound	4
18	powder	0	300	peri-wound	3
18	powder	0	300	peri-wound	2
18	powder	0	300	wound	1
18	powder	0	300	wound	1
18	powder	0	300	peri-wound	3
18	powder	0	300	peri-wound	1
18	powder	0	75	wound	4
18	powder	0	75	wound	3
18	powder	0	75	peri-wound	1
18	powder	0	75	peri-wound	3
18	powder	0	75	wound	3
18	powder	0	75	wound	3
18	powder	0	75	peri-wound	4
18	powder	0	75	peri-wound	4
18	powder	1	300	wound	2
18	powder	1	300	wound	1
18	powder	1	300	peri-wound	1
18	powder	1	300	peri-wound	1
18	powder	1	300	wound	2
18	powder	1	300	wound	2
18	powder	1	300	peri-wound	2
18	powder	1	300	peri-wound	2
18	powder	1	75	wound	2
18	powder	1	75	wound	3
18	powder	1	75	peri-wound	1
18	powder	1	75	peri-wound	1
18	powder	1	75	wound	1
18	powder	1	75	wound	1
18	powder	1	75	peri-wound	1
18	powder	1	75	peri-wound	2
18	powder	90	300	wound	2
18	powder	90	300	wound	3
18	powder	90	300	peri-wound	3
18	powder	90	300	peri-wound	3
18	powder	90	300	wound	3
18	powder	90	300	wound	1
18	powder	90	300	peri-wound	1
18	powder	90	300	peri-wound	1
18	powder	90	75	wound	1
18	powder	90	75	wound	3
18	powder	90	75	peri-wound	4
18	powder	90	75	peri-wound	3
18	powder	90	75	wound	4
18	powder	90	75	wound	1
18	powder	90	75	peri-wound	3
18	powder	90	75	peri-wound	2
18	powder	180	300	wound	2
18	powder	180	300	wound	2
18	powder	180	300	peri-wound	2
18	powder	180	300	peri-wound	2
18	powder	180	300	wound	2
18	powder	180	300	wound	2
18	powder	180	300	peri-wound	2
18	powder	180	300	peri-wound	2
18	powder	180	75	wound	1
18	powder	180	75	wound	1
18	powder	180	75	peri-wound	2
18	powder	180	75	peri-wound	1
18	powder	180	75	wound	1
18	powder	180	75	wound	1
18	powder	180	75	peri-wound	2
18	powder	180	75	peri-wound	2
19	powder	0	300	wound	1
19	powder	0	300	wound	1
19	powder	0	300	peri-wound	1
19	powder	0	300	peri-wound	1
19	powder	0	300	wound	1
19	powder	0	300	wound	1
19	powder	0	300	peri-wound	1
19	powder	0	300	peri-wound	1
19	powder	0	75	wound	1
19	powder	0	75	wound	1
19	powder	0	75	peri-wound	2
19	powder	0	75	peri-wound	1
19	powder	0	75	wound	1
19	powder	0	75	wound	1
19	powder	0	75	peri-wound	1
19	powder	0	75	peri-wound	1
19	powder	1	300	wound	2
19	powder	1	300	wound	1
19	powder	1	300	peri-wound	1
19	powder	1	300	peri-wound	1
19	powder	1	300	wound	1
19	powder	1	300	wound	1
19	powder	1	300	peri-wound	1
19	powder	1	300	peri-wound	1
19	powder	1	75	wound	2
19	powder	1	75	wound	2
19	powder	1	75	peri-wound	1
19	powder	1	75	peri-wound	1
19	powder	1	75	wound	2
19	powder	1	75	wound	1
19	powder	1	75	peri-wound	2
19	powder	1	75	peri-wound	1
19	powder	90	300	wound	2
19	powder	90	300	wound	2
19	powder	90	300	peri-wound	1
19	powder	90	300	peri-wound	1
19	powder	90	300	wound	1
19	powder	90	300	wound	1
19	powder	90	300	peri-wound	1
19	powder	90	300	peri-wound	1
19	powder	90	75	wound	1
19	powder	90	75	wound	1
19	powder	90	75	peri-wound	1
19	powder	90	75	peri-wound	1
19	powder	90	75	wound	1
19	powder	90	75	wound	1
19	powder	90	75	peri-wound	1
19	powder	90	75	peri-wound	2
19	powder	180	300	wound	2
19	powder	180	300	wound	3
19	powder	180	300	peri-wound	2
19	powder	180	300	peri-wound	2
19	powder	180	300	wound	2
19	powder	180	300	wound	2
19	powder	180	300	peri-wound	2
19	powder	180	300	peri-wound	2
19	powder	180	75	wound	1
19	powder	180	75	wound	2
19	powder	180	75	peri-wound	2
19	powder	180	75	peri-wound	2
19	powder	180	75	wound	2
19	powder	180	75	wound	2
19	powder	180	75	peri-wound	2
19	powder	180	75	peri-wound	1
20	powder	0	300	wound	1
20	powder	0	300	wound	1
20	powder	0	300	peri-wound	1
20	powder	0	300	peri-wound	1
20	powder	0	300	wound	1
20	powder	0	300	wound	1
20	powder	0	300	peri-wound	1
20	powder	0	300	peri-wound	1
20	powder	0	75	wound	1
20	powder	0	75	wound	1
20	powder	0	75	peri-wound	1
20	powder	0	75	peri-wound	1
20	powder	0	75	wound	2
20	powder	0	75	wound	1
20	powder	0	75	peri-wound	1
20	powder	0	75	peri-wound	1
20	powder	1	300	wound	2
20	powder	1	300	wound	1
20	powder	1	300	peri-wound	1
20	powder	1	300	peri-wound	1
20	powder	1	300	wound	1
20	powder	1	300	wound	1
20	powder	1	300	peri-wound	1
20	powder	1	300	peri-wound	1
20	powder	1	75	wound	1
20	powder	1	75	wound	1
20	powder	1	75	peri-wound	1
20	powder	1	75	peri-wound	1
20	powder	1	75	wound	1
20	powder	1	75	wound	1
20	powder	1	75	peri-wound	1
20	powder	1	75	peri-wound	1
20	powder	90	300	wound	1
20	powder	90	300	wound	1
20	powder	90	300	peri-wound	2
20	powder	90	300	peri-wound	2
20	powder	90	300	wound	1
20	powder	90	300	wound	1
20	powder	90	300	peri-wound	1
20	powder	90	300	peri-wound	1
20	powder	90	75	wound	1
20	powder	90	75	wound	1
20	powder	90	75	peri-wound	3
20	powder	90	75	peri-wound	1
20	powder	90	75	wound	1
20	powder	90	75	wound	1
20	powder	90	75	peri-wound	1
20	powder	90	75	peri-wound	1
20	powder	180	300	wound	2
20	powder	180	300	wound	2
20	powder	180	300	peri-wound	2
20	powder	180	300	peri-wound	2
20	powder	180	300	wound	1
20	powder	180	300	wound	1
20	powder	180	300	peri-wound	2
20	powder	180	300	peri-wound	2
20	powder	180	75	wound	4
20	powder	180	75	wound	1
20	powder	180	75	peri-wound	2
20	powder	180	75	peri-wound	1
20	powder	180	75	wound	1
20	powder	180	75	wound	2
20	powder	180	75	peri-wound	1
20	powder	180	75	peri-wound	1
21	powder	0	300	wound	1
21	powder	0	300	wound	1
21	powder	0	300	peri-wound	1
21	powder	0	300	peri-wound	1
21	powder	0	300	wound	1
21	powder	0	300	wound	1
21	powder	0	300	peri-wound	1
21	powder	0	300	peri-wound	1
21	powder	0	75	wound	1
21	powder	0	75	wound	1
21	powder	0	75	peri-wound	1
21	powder	0	75	peri-wound	1
21	powder	0	75	wound	1
21	powder	0	75	wound	1
21	powder	0	75	peri-wound	1
21	powder	0	75	peri-wound	1
21	powder	1	300	wound	1
21	powder	1	300	wound	1
21	powder	1	300	peri-wound	2
21	powder	1	300	peri-wound	1
21	powder	1	300	wound	2
21	powder	1	300	wound	1
21	powder	1	300	peri-wound	1
21	powder	1	300	peri-wound	2
21	powder	1	75	wound	1
21	powder	1	75	wound	1
21	powder	1	75	peri-wound	1
21	powder	1	75	peri-wound	1
21	powder	1	75	wound	2
21	powder	1	75	wound	1
21	powder	1	75	peri-wound	1
21	powder	1	75	peri-wound	1
21	powder	90	300	wound	2
21	powder	90	300	wound	2
21	powder	90	300	peri-wound	2
21	powder	90	300	peri-wound	2
21	powder	90	300	wound	1
21	powder	90	300	wound	1
21	powder	90	300	peri-wound	1
21	powder	90	300	peri-wound	1
21	powder	90	75	wound	2
21	powder	90	75	wound	3
21	powder	90	75	peri-wound	2
21	powder	90	75	peri-wound	2
21	powder	90	75	wound	2
21	powder	90	75	wound	1
21	powder	90	75	peri-wound	1
21	powder	90	75	peri-wound	1
21	powder	180	300	wound	3
21	powder	180	300	wound	1
21	powder	180	300	peri-wound	3
21	powder	180	300	peri-wound	2
21	powder	180	300	wound	2
21	powder	180	300	wound	1
21	powder	180	300	peri-wound	1
21	powder	180	300	peri-wound	1
21	powder	180	75	wound	3
21	powder	180	75	wound	3
21	powder	180	75	peri-wound	4
21	powder	180	75	peri-wound	3
21	powder	180	75	wound	3
21	powder	180	75	wound	1
21	powder	180	75	peri-wound	3
21	powder	180	75	peri-wound	2

## Sheet: Trial 2
Calf	Treatment	Time (h)	von Frey	Area	Score (+ 1)
400	cornual block	0	300	wound	1
400	cornual block	0	300	wound	1
400	cornual block	0	300	peri-wound	2
400	cornual block	0	300	peri-wound	1
400	cornual block	0	300	wound	1
400	cornual block	0	300	wound	1
400	cornual block	0	300	peri-wound	1
400	cornual block	0	300	peri-wound	1
400	cornual block	1	300	wound	1
400	cornual block	1	300	wound	1
400	cornual block	1	300	peri-wound	1
400	cornual block	1	300	peri-wound	1
400	cornual block	1	300	wound	1
400	cornual block	1	300	wound	1
400	cornual block	1	300	peri-wound	1
400	cornual block	1	300	peri-wound	1
400	cornual block	2	300	wound	1
400	cornual block	2	300	wound	1
400	cornual block	2	300	peri-wound	1
400	cornual block	2	300	peri-wound	1
400	cornual block	2	300	wound	2
400	cornual block	2	300	wound	1
400	cornual block	2	300	peri-wound	1
400	cornual block	2	300	peri-wound	1
400	cornual block	4	300	wound	3
400	cornual block	4	300	wound	1
400	cornual block	4	300	peri-wound	1
400	cornual block	4	300	peri-wound	1
400	cornual block	4	300	wound	2
400	cornual block	4	300	wound	1
400	cornual block	4	300	peri-wound	2
400	cornual block	4	300	peri-wound	1
400	cornual block	6	300	wound	2
400	cornual block	6	300	wound	1
400	cornual block	6	300	peri-wound	3
400	cornual block	6	300	peri-wound	1
400	cornual block	6	300	wound	3
400	cornual block	6	300	wound	1
400	cornual block	6	300	peri-wound	1
400	cornual block	6	300	peri-wound	1
401	cornual block	0	300	wound	1
401	cornual block	0	300	wound	1
401	cornual block	0	300	peri-wound	1
401	cornual block	0	300	peri-wound	1
401	cornual block	0	300	wound	1
401	cornual block	0	300	wound	1
401	cornual block	0	300	peri-wound	1
401	cornual block	0	300	peri-wound	1
401	cornual block	1	300	wound	1
401	cornual block	1	300	wound	1
401	cornual block	1	300	peri-wound	1
401	cornual block	1	300	peri-wound	1
401	cornual block	1	300	wound	2
401	cornual block	1	300	wound	1
401	cornual block	1	300	peri-wound	1
401	cornual block	1	300	peri-wound	1
401	cornual block	2	300	wound	1
401	cornual block	2	300	wound	3
401	cornual block	2	300	peri-wound	1
401	cornual block	2	300	peri-wound	2
401	cornual block	2	300	wound	1
401	cornual block	2	300	wound	1
401	cornual block	2	300	peri-wound	1
401	cornual block	2	300	peri-wound	1
401	cornual block	4	300	wound	3
401	cornual block	4	300	wound	3
401	cornual block	4	300	peri-wound	1
401	cornual block	4	300	peri-wound	3
401	cornual block	4	300	wound	1
401	cornual block	4	300	wound	2
401	cornual block	4	300	peri-wound	1
401	cornual block	4	300	peri-wound	1
401	cornual block	6	300	wound	4
401	cornual block	6	300	wound	4
401	cornual block	6	300	peri-wound	2
401	cornual block	6	300	peri-wound	2
401	cornual block	6	300	wound	3
401	cornual block	6	300	wound	3
401	cornual block	6	300	peri-wound	1
401	cornual block	6	300	peri-wound	2
402	cornual block	0	300	wound	1
402	cornual block	0	300	wound	1
402	cornual block	0	300	peri-wound	1
402	cornual block	0	300	peri-wound	1
402	cornual block	0	300	wound	1
402	cornual block	0	300	wound	1
402	cornual block	0	300	peri-wound	1
402	cornual block	0	300	peri-wound	1
402	cornual block	1	300	wound	1
402	cornual block	1	300	wound	1
402	cornual block	1	300	peri-wound	1
402	cornual block	1	300	peri-wound	1
402	cornual block	1	300	wound	1
402	cornual block	1	300	wound	1
402	cornual block	1	300	peri-wound	1
402	cornual block	1	300	peri-wound	1
402	cornual block	2	300	wound	1
402	cornual block	2	300	wound	2
402	cornual block	2	300	peri-wound	1
402	cornual block	2	300	peri-wound	1
402	cornual block	2	300	wound	3
402	cornual block	2	300	wound	1
402	cornual block	2	300	peri-wound	1
402	cornual block	2	300	peri-wound	2
402	cornual block	4	300	wound	2
402	cornual block	4	300	wound	2
402	cornual block	4	300	peri-wound	1
402	cornual block	4	300	peri-wound	2
402	cornual block	4	300	wound	2
402	cornual block	4	300	wound	2
402	cornual block	4	300	peri-wound	2
402	cornual block	4	300	peri-wound	2
402	cornual block	6	300	wound	2
402	cornual block	6	300	wound	3
402	cornual block	6	300	peri-wound	1
402	cornual block	6	300	peri-wound	2
402	cornual block	6	300	wound	3
402	cornual block	6	300	wound	2
402	cornual block	6	300	peri-wound	1
402	cornual block	6	300	peri-wound	1
403	cornual block	0	300	wound	1
403	cornual block	0	300	wound	1
403	cornual block	0	300	peri-wound	1
403	cornual block	0	300	peri-wound	1
403	cornual block	0	300	wound	1
403	cornual block	0	300	wound	1
403	cornual block	0	300	peri-wound	1
403	cornual block	0	300	peri-wound	1
403	cornual block	1	300	wound	1
403	cornual block	1	300	wound	1
403	cornual block	1	300	peri-wound	1
403	cornual block	1	300	peri-wound	1
403	cornual block	1	300	wound	1
403	cornual block	1	300	wound	1
403	cornual block	1	300	peri-wound	1
403	cornual block	1	300	peri-wound	1
403	cornual block	2	300	wound	1
403	cornual block	2	300	wound	1
403	cornual block	2	300	peri-wound	1
403	cornual block	2	300	peri-wound	1
403	cornual block	2	300	wound	1
403	cornual block	2	300	wound	1
403	cornual block	2	300	peri-wound	1
403	cornual block	2	300	peri-wound	1
403	cornual block	4	300	wound	1
403	cornual block	4	300	wound	1
403	cornual block	4	300	peri-wound	1
403	cornual block	4	300	peri-wound	1
403	cornual block	4	300	wound	1
403	cornual block	4	300	wound	1
403	cornual block	4	300	peri-wound	1
403	cornual block	4	300	peri-wound	1
403	cornual block	6	300	wound	1
403	cornual block	6	300	wound	1
403	cornual block	6	300	peri-wound	1
403	cornual block	6	300	peri-wound	1
403	cornual block	6	300	wound	3
403	cornual block	6	300	wound	3
403	cornual block	6	300	peri-wound	1
403	cornual block	6	300	peri-wound	1
404	cornual block	0	300	wound	1
404	cornual block	0	300	wound	1
404	cornual block	0	300	peri-wound	1
404	cornual block	0	300	peri-wound	1
404	cornual block	0	300	wound	3
404	cornual block	0	300	wound	3
404	cornual block	0	300	peri-wound	1
404	cornual block	0	300	peri-wound	1
404	cornual block	1	300	wound	1
404	cornual block	1	300	wound	3
404	cornual block	1	300	peri-wound	1
404	cornual block	1	300	peri-wound	1
404	cornual block	1	300	wound	1
404	cornual block	1	300	wound	1
404	cornual block	1	300	peri-wound	1
404	cornual block	1	300	peri-wound	1
404	cornual block	2	300	wound	2
404	cornual block	2	300	wound	3
404	cornual block	2	300	peri-wound	1
404	cornual block	2	300	peri-wound	1
404	cornual block	2	300	wound	1
404	cornual block	2	300	wound	2
404	cornual block	2	300	peri-wound	1
404	cornual block	2	300	peri-wound	1
404	cornual block	4	300	wound	3
404	cornual block	4	300	wound	1
404	cornual block	4	300	peri-wound	1
404	cornual block	4	300	peri-wound	3
404	cornual block	4	300	wound	4
404	cornual block	4	300	wound	1
404	cornual block	4	300	peri-wound	3
404	cornual block	4	300	peri-wound	3
404	cornual block	6	300	wound	2
404	cornual block	6	300	wound	2
404	cornual block	6	300	peri-wound	2
404	cornual block	6	300	peri-wound	3
404	cornual block	6	300	wound	3
404	cornual block	6	300	wound	1
404	cornual block	6	300	peri-wound	2
404	cornual block	6	300	peri-wound	2
424	cornual block	0	300	wound	1
424	cornual block	0	300	wound	1
424	cornual block	0	300	peri-wound	1
424	cornual block	0	300	peri-wound	1
424	cornual block	0	300	wound	1
424	cornual block	0	300	wound	1
424	cornual block	0	300	peri-wound	1
424	cornual block	0	300	peri-wound	1
424	cornual block	1	300	wound	1
424	cornual block	1	300	wound	1
424	cornual block	1	300	peri-wound	1
424	cornual block	1	300	peri-wound	1
424	cornual block	1	300	wound	1
424	cornual block	1	300	wound	1
424	cornual block	1	300	peri-wound	1
424	cornual block	1	300	peri-wound	1
424	cornual block	2	300	wound	1
424	cornual block	2	300	wound	1
424	cornual block	2	300	peri-wound	2
424	cornual block	2	300	peri-wound	1
424	cornual block	2	300	wound	2
424	cornual block	2	300	wound	1
424	cornual block	2	300	peri-wound	1
424	cornual block	2	300	peri-wound	2
424	cornual block	4	300	wound	3
424	cornual block	4	300	wound	3
424	cornual block	4	300	peri-wound	2
424	cornual block	4	300	peri-wound	3
424	cornual block	4	300	wound	1
424	cornual block	4	300	wound	1
424	cornual block	4	300	peri-wound	2
424	cornual block	4	300	peri-wound	2
424	cornual block	6	300	wound	3
424	cornual block	6	300	wound	3
424	cornual block	6	300	peri-wound	3
424	cornual block	6	300	peri-wound	3
424	cornual block	6	300	wound	3
424	cornual block	6	300	wound	3
424	cornual block	6	300	peri-wound	2
424	cornual block	6	300	peri-wound	2
425	cornual block	0	300	wound	1
425	cornual block	0	300	wound	1
425	cornual block	0	300	peri-wound	1
425	cornual block	0	300	peri-wound	1
425	cornual block	0	300	wound	1
425	cornual block	0	300	wound	1
425	cornual block	0	300	peri-wound	1
425	cornual block	0	300	peri-wound	1
425	cornual block	1	300	wound	1
425	cornual block	1	300	wound	1
425	cornual block	1	300	peri-wound	1
425	cornual block	1	300	peri-wound	2
425	cornual block	1	300	wound	1
425	cornual block	1	300	wound	1
425	cornual block	1	300	peri-wound	1
425	cornual block	1	300	peri-wound	1
425	cornual block	2	300	wound	1
425	cornual block	2	300	wound	2
425	cornual block	2	300	peri-wound	1
425	cornual block	2	300	peri-wound	1
425	cornual block	2	300	wound	1
425	cornual block	2	300	wound	1
425	cornual block	2	300	peri-wound	1
425	cornual block	2	300	peri-wound	1
425	cornual block	4	300	wound	1
425	cornual block	4	300	wound	2
425	cornual block	4	300	peri-wound	1
425	cornual block	4	300	peri-wound	1
425	cornual block	4	300	wound	4
425	cornual block	4	300	wound	1
425	cornual block	4	300	peri-wound	1
425	cornual block	4	300	peri-wound	2
425	cornual block	6	300	wound	2
425	cornual block	6	300	wound	3
425	cornual block	6	300	peri-wound	2
425	cornual block	6	300	peri-wound	1
425	cornual block	6	300	wound	4
425	cornual block	6	300	wound	2
425	cornual block	6	300	peri-wound	1
425	cornual block	6	300	peri-wound	1
426	cornual block	0	300	wound	1
426	cornual block	0	300	wound	1
426	cornual block	0	300	peri-wound	1
426	cornual block	0	300	peri-wound	1
426	cornual block	0	300	wound	1
426	cornual block	0	300	wound	1
426	cornual block	0	300	peri-wound	1
426	cornual block	0	300	peri-wound	1
426	cornual block	1	300	wound	1
426	cornual block	1	300	wound	1
426	cornual block	1	300	peri-wound	1
426	cornual block	1	300	peri-wound	1
426	cornual block	1	300	wound	1
426	cornual block	1	300	wound	1
426	cornual block	1	300	peri-wound	1
426	cornual block	1	300	peri-wound	2
426	cornual block	2	300	wound	1
426	cornual block	2	300	wound	2
426	cornual block	2	300	peri-wound	1
426	cornual block	2	300	peri-wound	1
426	cornual block	2	300	wound	1
426	cornual block	2	300	wound	1
426	cornual block	2	300	peri-wound	1
426	cornual block	2	300	peri-wound	1
426	cornual block	4	300	wound	1
426	cornual block	4	300	wound	1
426	cornual block	4	300	peri-wound	1
426	cornual block	4	300	peri-wound	1
426	cornual block	4	300	wound	1
426	cornual block	4	300	wound	2
426	cornual block	4	300	peri-wound	1
426	cornual block	4	300	peri-wound	1
426	cornual block	6	300	wound	1
426	cornual block	6	300	wound	2
426	cornual block	6	300	peri-wound	1
426	cornual block	6	300	peri-wound	1
426	cornual block	6	300	wound	1
426	cornual block	6	300	wound	1
426	cornual block	6	300	peri-wound	1
426	cornual block	6	300	peri-wound	1
427	cornual block	0	300	wound	1
427	cornual block	0	300	wound	1
427	cornual block	0	300	peri-wound	1
427	cornual block	0	300	peri-wound	1
427	cornual block	0	300	wound	1
427	cornual block	0	300	wound	1
427	cornual block	0	300	peri-wound	1
427	cornual block	0	300	peri-wound	1
427	cornual block	1	300	wound	1
427	cornual block	1	300	wound	1
427	cornual block	1	300	peri-wound	1
427	cornual block	1	300	peri-wound	1
427	cornual block	1	300	wound	1
427	cornual block	1	300	wound	1
427	cornual block	1	300	peri-wound	1
427	cornual block	1	300	peri-wound	1
427	cornual block	2	300	wound	1
427	cornual block	2	300	wound	1
427	cornual block	2	300	peri-wound	1
427	cornual block	2	300	peri-wound	1
427	cornual block	2	300	wound	3
427	cornual block	2	300	wound	1
427	cornual block	2	300	peri-wound	1
427	cornual block	2	300	peri-wound	1
427	cornual block	4	300	wound	2
427	cornual block	4	300	wound	1
427	cornual block	4	300	peri-wound	1
427	cornual block	4	300	peri-wound	1
427	cornual block	4	300	wound	1
427	cornual block	4	300	wound	1
427	cornual block	4	300	peri-wound	1
427	cornual block	4	300	peri-wound	1
427	cornual block	6	300	wound	2
427	cornual block	6	300	wound	2
427	cornual block	6	300	peri-wound	2
427	cornual block	6	300	peri-wound	1
427	cornual block	6	300	wound	1
427	cornual block	6	300	wound	1
427	cornual block	6	300	peri-wound	1
427	cornual block	6	300	peri-wound	1
428	gel	0	300	wound	1
428	gel	0	300	wound	1
428	gel	0	300	peri-wound	1
428	gel	0	300	peri-wound	1
428	gel	0	300	wound	1
428	gel	0	300	wound	2
428	gel	0	300	peri-wound	1
428	gel	0	300	peri-wound	1
428	gel	1	300	wound	1
428	gel	1	300	wound	2
428	gel	1	300	peri-wound	1
428	gel	1	300	peri-wound	1
428	gel	1	300	wound	1
428	gel	1	300	wound	1
428	gel	1	300	peri-wound	1
428	gel	1	300	peri-wound	1
428	gel	2	300	wound	1
428	gel	2	300	wound	2
428	gel	2	300	peri-wound	1
428	gel	2	300	peri-wound	1
428	gel	2	300	wound	1
428	gel	2	300	wound	1
428	gel	2	300	peri-wound	1
428	gel	2	300	peri-wound	1
428	gel	4	300	wound	2
428	gel	4	300	wound	1
428	gel	4	300	peri-wound	1
428	gel	4	300	peri-wound	2
428	gel	4	300	wound	1
428	gel	4	300	wound	1
428	gel	4	300	peri-wound	1
428	gel	4	300	peri-wound	1
428	gel	6	300	wound	1
428	gel	6	300	wound	1
428	gel	6	300	peri-wound	1
428	gel	6	300	peri-wound	1
428	gel	6	300	wound	1
428	gel	6	300	wound	1
428	gel	6	300	peri-wound	1
428	gel	6	300	peri-wound	1
429	gel	0	300	wound	1
429	gel	0	300	wound	1
429	gel	0	300	peri-wound	1
429	gel	0	300	peri-wound	1
429	gel	0	300	wound	2
429	gel	0	300	wound	1
429	gel	0	300	peri-wound	1
429	gel	0	300	peri-wound	1
429	gel	1	300	wound	1
429	gel	1	300	wound	1
429	gel	1	300	peri-wound	1
429	gel	1	300	peri-wound	1
429	gel	1	300	wound	1
429	gel	1	300	wound	1
429	gel	1	300	peri-wound	1
429	gel	1	300	peri-wound	1
429	gel	2	300	wound	1
429	gel	2	300	wound	1
429	gel	2	300	peri-wound	1
429	gel	2	300	peri-wound	1
429	gel	2	300	wound	4
429	gel	2	300	wound	1
429	gel	2	300	peri-wound	1
429	gel	2	300	peri-wound	2
429	gel	4	300	wound	1
429	gel	4	300	wound	1
429	gel	4	300	peri-wound	1
429	gel	4	300	peri-wound	1
429	gel	4	300	wound	3
429	gel	4	300	wound	2
429	gel	4	300	peri-wound	1
429	gel	4	300	peri-wound	1
429	gel	6	300	wound	1
429	gel	6	300	wound	4
429	gel	6	300	peri-wound	2
429	gel	6	300	peri-wound	1
429	gel	6	300	wound	3
429	gel	6	300	wound	3
429	gel	6	300	peri-wound	1
429	gel	6	300	peri-wound	1
430	gel	0	300	wound	2
430	gel	0	300	wound	1
430	gel	0	300	peri-wound	1
430	gel	0	300	peri-wound	1
430	gel	0	300	wound	1
430	gel	0	300	wound	1
430	gel	0	300	peri-wound	1
430	gel	0	300	peri-wound	1
430	gel	1	300	wound	1
430	gel	1	300	wound	2
430	gel	1	300	peri-wound	1
430	gel	1	300	peri-wound	1
430	gel	1	300	wound	2
430	gel	1	300	wound	1
430	gel	1	300	peri-wound	2
430	gel	1	300	peri-wound	2
430	gel	2	300	wound	3
430	gel	2	300	wound	1
430	gel	2	300	peri-wound	1
430	gel	2	300	peri-wound	1
430	gel	2	300	wound	1
430	gel	2	300	wound	4
430	gel	2	300	peri-wound	1
430	gel	2	300	peri-wound	1
430	gel	4	300	wound	1
430	gel	4	300	wound	2
430	gel	4	300	peri-wound	1
430	gel	4	300	peri-wound	1
430	gel	4	300	wound	4
430	gel	4	300	wound	3
430	gel	4	300	peri-wound	2
430	gel	4	300	peri-wound	2
430	gel	6	300	wound	3
430	gel	6	300	wound	3
430	gel	6	300	peri-wound	3
430	gel	6	300	peri-wound	3
430	gel	6	300	wound	3
430	gel	6	300	wound	1
430	gel	6	300	peri-wound	3
430	gel	6	300	peri-wound	1
434	gel	0	300	wound	1
434	gel	0	300	wound	1
434	gel	0	300	peri-wound	1
434	gel	0	300	peri-wound	1
434	gel	0	300	wound	1
434	gel	0	300	wound	1
434	gel	0	300	peri-wound	1
434	gel	0	300	peri-wound	1
434	gel	1	300	wound	2
434	gel	1	300	wound	3
434	gel	1	300	peri-wound	1
434	gel	1	300	peri-wound	2
434	gel	1	300	wound	3
434	gel	1	300	wound	1
434	gel	1	300	peri-wound	1
434	gel	1	300	peri-wound	3
434	gel	2	300	wound	1
434	gel	2	300	wound	3
434	gel	2	300	peri-wound	1
434	gel	2	300	peri-wound	2
434	gel	2	300	wound	3
434	gel	2	300	wound	1
434	gel	2	300	peri-wound	2
434	gel	2	300	peri-wound	3
434	gel	4	300	wound	3
434	gel	4	300	wound	1
434	gel	4	300	peri-wound	3
434	gel	4	300	peri-wound	3
434	gel	4	300	wound	1
434	gel	4	300	wound	3
434	gel	4	300	peri-wound	1
434	gel	4	300	peri-wound	1
434	gel	6	300	wound	1
434	gel	6	300	wound	3
434	gel	6	300	peri-wound	2
434	gel	6	300	peri-wound	2
434	gel	6	300	wound	3
434	gel	6	300	wound	4
434	gel	6	300	peri-wound	1
434	gel	6	300	peri-wound	1
406	gel	0	300	wound	1
406	gel	0	300	wound	1
406	gel	0	300	peri-wound	1
406	gel	0	300	peri-wound	1
406	gel	0	300	wound	1
406	gel	0	300	wound	1
406	gel	0	300	peri-wound	2
406	gel	0	300	peri-wound	1
406	gel	1	300	wound	2
406	gel	1	300	wound	1
406	gel	1	300	peri-wound	1
406	gel	1	300	peri-wound	1
406	gel	1	300	wound	1
406	gel	1	300	wound	1
406	gel	1	300	peri-wound	1
406	gel	1	300	peri-wound	1
406	gel	2	300	wound	4
406	gel	2	300	wound	1
406	gel	2	300	peri-wound	3
406	gel	2	300	peri-wound	1
406	gel	2	300	wound	2
406	gel	2	300	wound	2
406	gel	2	300	peri-wound	1
406	gel	2	300	peri-wound	2
406	gel	4	300	wound	4
406	gel	4	300	wound	1
406	gel	4	300	peri-wound	1
406	gel	4	300	peri-wound	3
406	gel	4	300	wound	1
406	gel	4	300	wound	2
406	gel	4	300	peri-wound	1
406	gel	4	300	peri-wound	3
406	gel	6	300	wound	1
406	gel	6	300	wound	1
406	gel	6	300	peri-wound	2
406	gel	6	300	peri-wound	2
406	gel	6	300	wound	1
406	gel	6	300	wound	3
406	gel	6	300	peri-wound	1
406	gel	6	300	peri-wound	1
407	gel	0	300	wound	1
407	gel	0	300	wound	1
407	gel	0	300	peri-wound	1
407	gel	0	300	peri-wound	1
407	gel	0	300	wound	1
407	gel	0	300	wound	1
407	gel	0	300	peri-wound	1
407	gel	0	300	peri-wound	1
407	gel	1	300	wound	1
407	gel	1	300	wound	2
407	gel	1	300	peri-wound	1
407	gel	1	300	peri-wound	1
407	gel	1	300	wound	1
407	gel	1	300	wound	1
407	gel	1	300	peri-wound	1
407	gel	1	300	peri-wound	1
407	gel	2	300	wound	1
407	gel	2	300	wound	2
407	gel	2	300	peri-wound	2
407	gel	2	300	peri-wound	1
407	gel	2	300	wound	3
407	gel	2	300	wound	1
407	gel	2	300	peri-wound	2
407	gel	2	300	peri-wound	1
407	gel	4	300	wound	1
407	gel	4	300	wound	1
407	gel	4	300	peri-wound	2
407	gel	4	300	peri-wound	2
407	gel	4	300	wound	1
407	gel	4	300	wound	1
407	gel	4	300	peri-wound	3
407	gel	4	300	peri-wound	1
407	gel	6	300	wound	1
407	gel	6	300	wound	1
407	gel	6	300	peri-wound	2
407	gel	6	300	peri-wound	1
407	gel	6	300	wound	1
407	gel	6	300	wound	2
407	gel	6	300	peri-wound	1
407	gel	6	300	peri-wound	1
410	gel	0	300	wound	1
410	gel	0	300	wound	2
410	gel	0	300	peri-wound	1
410	gel	0	300	peri-wound	1
410	gel	0	300	wound	1
410	gel	0	300	wound	1
410	gel	0	300	peri-wound	1
410	gel	0	300	peri-wound	1
410	gel	1	300	wound	1
410	gel	1	300	wound	2
410	gel	1	300	peri-wound	1
410	gel	1	300	peri-wound	1
410	gel	1	300	wound	2
410	gel	1	300	wound	1
410	gel	1	300	peri-wound	1
410	gel	1	300	peri-wound	1
410	gel	2	300	wound	1
410	gel	2	300	wound	1
410	gel	2	300	peri-wound	1
410	gel	2	300	peri-wound	1
410	gel	2	300	wound	1
410	gel	2	300	wound	1
410	gel	2	300	peri-wound	1
410	gel	2	300	peri-wound	1
410	gel	4	300	wound	2
410	gel	4	300	wound	1
410	gel	4	300	peri-wound	1
410	gel	4	300	peri-wound	1
410	gel	4	300	wound	2
410	gel	4	300	wound	1
410	gel	4	300	peri-wound	1
410	gel	4	300	peri-wound	2
410	gel	6	300	wound	1
410	gel	6	300	wound	1
410	gel	6	300	peri-wound	1
410	gel	6	300	peri-wound	1
410	gel	6	300	wound	1
410	gel	6	300	wound	1
410	gel	6	300	peri-wound	1
410	gel	6	300	peri-wound	1
411	gel	0	300	wound	1
411	gel	0	300	wound	1
411	gel	0	300	peri-wound	1
411	gel	0	300	peri-wound	1
411	gel	0	300	wound	1
411	gel	0	300	wound	1
411	gel	0	300	peri-wound	1
411	gel	0	300	peri-wound	1
411	gel	1	300	wound	2
411	gel	1	300	wound	2
411	gel	1	300	peri-wound	1
411	gel	1	300	peri-wound	1
411	gel	1	300	wound	1
411	gel	1	300	wound	1
411	gel	1	300	peri-wound	1
411	gel	1	300	peri-wound	1
411	gel	2	300	wound	3
411	gel	2	300	wound	2
411	gel	2	300	peri-wound	1
411	gel	2	300	peri-wound	1
411	gel	2	300	wound	2
411	gel	2	300	wound	1
411	gel	2	300	peri-wound	1
411	gel	2	300	peri-wound	1
411	gel	4	300	wound	2
411	gel	4	300	wound	1
411	gel	4	300	peri-wound	1
411	gel	4	300	peri-wound	1
411	gel	4	300	wound	2
411	gel	4	300	wound	2
411	gel	4	300	peri-wound	1
411	gel	4	300	peri-wound	1
411	gel	6	300	wound	2
411	gel	6	300	wound	2
411	gel	6	300	peri-wound	1
411	gel	6	300	peri-wound	1
411	gel	6	300	wound	1
411	gel	6	300	wound	1
411	gel	6	300	peri-wound	2
411	gel	6	300	peri-wound	2
413	gel	0	300	wound	1
413	gel	0	300	wound	1
413	gel	0	300	peri-wound	1
413	gel	0	300	peri-wound	1
413	gel	0	300	wound	1
413	gel	0	300	wound	1
413	gel	0	300	peri-wound	1
413	gel	0	300	peri-wound	1
413	gel	1	300	wound	1
413	gel	1	300	wound	1
413	gel	1	300	peri-wound	1
413	gel	1	300	peri-wound	1
413	gel	1	300	wound	1
413	gel	1	300	wound	2
413	gel	1	300	peri-wound	1
413	gel	1	300	peri-wound	1
413	gel	2	300	wound	2
413	gel	2	300	wound	1
413	gel	2	300	peri-wound	2
413	gel	2	300	peri-wound	1
413	gel	2	300	wound	2
413	gel	2	300	wound	1
413	gel	2	300	peri-wound	2
413	gel	2	300	peri-wound	1
413	gel	4	300	wound	2
413	gel	4	300	wound	3
413	gel	4	300	peri-wound	2
413	gel	4	300	peri-wound	2
413	gel	4	300	wound	3
413	gel	4	300	wound	3
413	gel	4	300	peri-wound	2
413	gel	4	300	peri-wound	1
413	gel	6	300	wound	3
413	gel	6	300	wound	2
413	gel	6	300	peri-wound	2
413	gel	6	300	peri-wound	1
413	gel	6	300	wound	3
413	gel	6	300	wound	3
413	gel	6	300	peri-wound	3
413	gel	6	300	peri-wound	3
405	ethanol spray	0	300	wound	1
405	ethanol spray	0	300	wound	1
405	ethanol spray	0	300	peri-wound	1
405	ethanol spray	0	300	peri-wound	1
405	ethanol spray	0	300	wound	1
405	ethanol spray	0	300	wound	2
405	ethanol spray	0	300	peri-wound	1
405	ethanol spray	0	300	peri-wound	1
405	ethanol spray	1	300	wound	1
405	ethanol spray	1	300	wound	3
405	ethanol spray	1	300	peri-wound	1
405	ethanol spray	1	300	peri-wound	1
405	ethanol spray	1	300	wound	1
405	ethanol spray	1	300	wound	1
405	ethanol spray	1	300	peri-wound	1
405	ethanol spray	1	300	peri-wound	2
405	ethanol spray	2	300	wound	4
405	ethanol spray	2	300	wound	4
405	ethanol spray	2	300	peri-wound	1
405	ethanol spray	2	300	peri-wound	1
405	ethanol spray	2	300	wound	3
405	ethanol spray	2	300	wound	3
405	ethanol spray	2	300	peri-wound	1
405	ethanol spray	2	300	peri-wound	3
405	ethanol spray	4	300	wound	4
405	ethanol spray	4	300	wound	4
405	ethanol spray	4	300	peri-wound	4
405	ethanol spray	4	300	peri-wound	4
405	ethanol spray	4	300	wound	4
405	ethanol spray	4	300	wound	4
405	ethanol spray	4	300	peri-wound	3
405	ethanol spray	4	300	peri-wound	3
405	ethanol spray	6	300	wound	4
405	ethanol spray	6	300	wound	4
405	ethanol spray	6	300	peri-wound	4
405	ethanol spray	6	300	peri-wound	3
405	ethanol spray	6	300	wound	4
405	ethanol spray	6	300	wound	4
405	ethanol spray	6	300	peri-wound	3
405	ethanol spray	6	300	peri-wound	3
408	ethanol spray	0	300	wound	1
408	ethanol spray	0	300	wound	1
408	ethanol spray	0	300	peri-wound	1
408	ethanol spray	0	300	peri-wound	1
408	ethanol spray	0	300	wound	1
408	ethanol spray	0	300	wound	1
408	ethanol spray	0	300	peri-wound	1
408	ethanol spray	0	300	peri-wound	1
408	ethanol spray	1	300	wound	1
408	ethanol spray	1	300	wound	1
408	ethanol spray	1	300	peri-wound	1
408	ethanol spray	1	300	peri-wound	1
408	ethanol spray	1	300	wound	1
408	ethanol spray	1	300	wound	1
408	ethanol spray	1	300	peri-wound	1
408	ethanol spray	1	300	peri-wound	1
408	ethanol spray	2	300	wound	1
408	ethanol spray	2	300	wound	1
408	ethanol spray	2	300	peri-wound	1
408	ethanol spray	2	300	peri-wound	1
408	ethanol spray	2	300	wound	1
408	ethanol spray	2	300	wound	2
408	ethanol spray	2	300	peri-wound	1
408	ethanol spray	2	300	peri-wound	2
408	ethanol spray	4	300	wound	1
408	ethanol spray	4	300	wound	1
408	ethanol spray	4	300	peri-wound	2
408	ethanol spray	4	300	peri-wound	1
408	ethanol spray	4	300	wound	1
408	ethanol spray	4	300	wound	2
408	ethanol spray	4	300	peri-wound	1
408	ethanol spray	4	300	peri-wound	1
408	ethanol spray	6	300	wound	1
408	ethanol spray	6	300	wound	1
408	ethanol spray	6	300	peri-wound	1
408	ethanol spray	6	300	peri-wound	1
408	ethanol spray	6	300	wound	1
408	ethanol spray	6	300	wound	2
408	ethanol spray	6	300	peri-wound	1
408	ethanol spray	6	300	peri-wound	1
409	ethanol spray	0	300	wound	1
409	ethanol spray	0	300	wound	1
409	ethanol spray	0	300	peri-wound	2
409	ethanol spray	0	300	peri-wound	1
409	ethanol spray	0	300	wound	1
409	ethanol spray	0	300	wound	1
409	ethanol spray	0	300	peri-wound	1
409	ethanol spray	0	300	peri-wound	1
409	ethanol spray	1	300	wound	1
409	ethanol spray	1	300	wound	1
409	ethanol spray	1	300	peri-wound	1
409	ethanol spray	1	300	peri-wound	1
409	ethanol spray	1	300	wound	1
409	ethanol spray	1	300	wound	1
409	ethanol spray	1	300	peri-wound	1
409	ethanol spray	1	300	peri-wound	1
409	ethanol spray	2	300	wound	2
409	ethanol spray	2	300	wound	1
409	ethanol spray	2	300	peri-wound	1
409	ethanol spray	2	300	peri-wound	1
409	ethanol spray	2	300	wound	3
409	ethanol spray	2	300	wound	2
409	ethanol spray	2	300	peri-wound	1
409	ethanol spray	2	300	peri-wound	2
409	ethanol spray	4	300	wound	1
409	ethanol spray	4	300	wound	3
409	ethanol spray	4	300	peri-wound	1
409	ethanol spray	4	300	peri-wound	2
409	ethanol spray	4	300	wound	3
409	ethanol spray	4	300	wound	3
409	ethanol spray	4	300	peri-wound	1
409	ethanol spray	4	300	peri-wound	2
409	ethanol spray	6	300	wound	2
409	ethanol spray	6	300	wound	3
409	ethanol spray	6	300	peri-wound	2
409	ethanol spray	6	300	peri-wound	2
409	ethanol spray	6	300	wound	3
409	ethanol spray	6	300	wound	1
409	ethanol spray	6	300	peri-wound	1
409	ethanol spray	6	300	peri-wound	2
412	ethanol spray	0	300	wound	1
412	ethanol spray	0	300	wound	1
412	ethanol spray	0	300	peri-wound	2
412	ethanol spray	0	300	peri-wound	1
412	ethanol spray	0	300	wound	1
412	ethanol spray	0	300	wound	1
412	ethanol spray	0	300	peri-wound	1
412	ethanol spray	0	300	peri-wound	1
412	ethanol spray	1	300	wound	1
412	ethanol spray	1	300	wound	2
412	ethanol spray	1	300	peri-wound	1
412	ethanol spray	1	300	peri-wound	1
412	ethanol spray	1	300	wound	1
412	ethanol spray	1	300	wound	1
412	ethanol spray	1	300	peri-wound	1
412	ethanol spray	1	300	peri-wound	1
412	ethanol spray	2	300	wound	4
412	ethanol spray	2	300	wound	2
412	ethanol spray	2	300	peri-wound	1
412	ethanol spray	2	300	peri-wound	1
412	ethanol spray	2	300	wound	1
412	ethanol spray	2	300	wound	1
412	ethanol spray	2	300	peri-wound	1
412	ethanol spray	2	300	peri-wound	1
412	ethanol spray	4	300	wound	3
412	ethanol spray	4	300	wound	2
412	ethanol spray	4	300	peri-wound	1
412	ethanol spray	4	300	peri-wound	1
412	ethanol spray	4	300	wound	1
412	ethanol spray	4	300	wound	2
412	ethanol spray	4	300	peri-wound	1
412	ethanol spray	4	300	peri-wound	1
412	ethanol spray	6	300	wound	2
412	ethanol spray	6	300	wound	4
412	ethanol spray	6	300	peri-wound	1
412	ethanol spray	6	300	peri-wound	1
412	ethanol spray	6	300	wound	1
412	ethanol spray	6	300	wound	1
412	ethanol spray	6	300	peri-wound	1
412	ethanol spray	6	300	peri-wound	1
431	ethanol spray	0	300	wound	1
431	ethanol spray	0	300	wound	1
431	ethanol spray	0	300	peri-wound	1
431	ethanol spray	0	300	peri-wound	1
431	ethanol spray	0	300	wound	1
431	ethanol spray	0	300	wound	1
431	ethanol spray	0	300	peri-wound	1
431	ethanol spray	0	300	peri-wound	1
431	ethanol spray	1	300	wound	1
431	ethanol spray	1	300	wound	2
431	ethanol spray	1	300	peri-wound	1
431	ethanol spray	1	300	peri-wound	2
431	ethanol spray	1	300	wound	1
431	ethanol spray	1	300	wound	1
431	ethanol spray	1	300	peri-wound	1
431	ethanol spray	1	300	peri-wound	2
431	ethanol spray	2	300	wound	1
431	ethanol spray	2	300	wound	1
431	ethanol spray	2	300	peri-wound	1
431	ethanol spray	2	300	peri-wound	1
431	ethanol spray	2	300	wound	1
431	ethanol spray	2	300	wound	1
431	ethanol spray	2	300	peri-wound	1
431	ethanol spray	2	300	peri-wound	1
431	ethanol spray	4	300	wound	1
431	ethanol spray	4	300	wound	2
431	ethanol spray	4	300	peri-wound	1
431	ethanol spray	4	300	peri-wound	1
431	ethanol spray	4	300	wound	1
431	ethanol spray	4	300	wound	1
431	ethanol spray	4	300	peri-wound	1
431	ethanol spray	4	300	peri-wound	2
431	ethanol spray	6	300	wound	2
431	ethanol spray	6	300	wound	1
431	ethanol spray	6	300	peri-wound	1
431	ethanol spray	6	300	peri-wound	2
431	ethanol spray	6	300	wound	2
431	ethanol spray	6	300	wound	2
431	ethanol spray	6	300	peri-wound	2
431	ethanol spray	6	300	peri-wound	3
433	ethanol spray	0	300	wound	1
433	ethanol spray	0	300	wound	1
433	ethanol spray	0	300	peri-wound	1
433	ethanol spray	0	300	peri-wound	1
433	ethanol spray	0	300	wound	2
433	ethanol spray	0	300	wound	1
433	ethanol spray	0	300	peri-wound	1
433	ethanol spray	0	300	peri-wound	1
433	ethanol spray	1	300	wound	1
433	ethanol spray	1	300	wound	1
433	ethanol spray	1	300	peri-wound	1
433	ethanol spray	1	300	peri-wound	1
433	ethanol spray	1	300	wound	2
433	ethanol spray	1	300	wound	1
433	ethanol spray	1	300	peri-wound	1
433	ethanol spray	1	300	peri-wound	1
433	ethanol spray	2	300	wound	1
433	ethanol spray	2	300	wound	2
433	ethanol spray	2	300	peri-wound	1
433	ethanol spray	2	300	peri-wound	1
433	ethanol spray	2	300	wound	2
433	ethanol spray	2	300	wound	1
433	ethanol spray	2	300	peri-wound	1
433	ethanol spray	2	300	peri-wound	1
433	ethanol spray	4	300	wound	1
433	ethanol spray	4	300	wound	1
433	ethanol spray	4	300	peri-wound	1
433	ethanol spray	4	300	peri-wound	1
433	ethanol spray	4	300	wound	1
433	ethanol spray	4	300	wound	2
433	ethanol spray	4	300	peri-wound	1
433	ethanol spray	4	300	peri-wound	1
433	ethanol spray	6	300	wound	1
433	ethanol spray	6	300	wound	1
433	ethanol spray	6	300	peri-wound	1
433	ethanol spray	6	300	peri-wound	1
433	ethanol spray	6	300	wound	1
433	ethanol spray	6	300	wound	1
433	ethanol spray	6	300	peri-wound	1
433	ethanol spray	6	300	peri-wound	1
435	ethanol spray	0	300	wound	1
435	ethanol spray	0	300	wound	1
435	ethanol spray	0	300	peri-wound	1
435	ethanol spray	0	300	peri-wound	1
435	ethanol spray	0	300	wound	1
435	ethanol spray	0	300	wound	1
435	ethanol spray	0	300	peri-wound	1
435	ethanol spray	0	300	peri-wound	1
435	ethanol spray	1	300	wound	1
435	ethanol spray	1	300	wound	1
435	ethanol spray	1	300	peri-wound	1
435	ethanol spray	1	300	peri-wound	1
435	ethanol spray	1	300	wound	1
435	ethanol spray	1	300	wound	2
435	ethanol spray	1	300	peri-wound	1
435	ethanol spray	1	300	peri-wound	1
435	ethanol spray	2	300	wound	1
435	ethanol spray	2	300	wound	1
435	ethanol spray	2	300	peri-wound	1
435	ethanol spray	2	300	peri-wound	1
435	ethanol spray	2	300	wound	1
435	ethanol spray	2	300	wound	1
435	ethanol spray	2	300	peri-wound	1
435	ethanol spray	2	300	peri-wound	2
435	ethanol spray	4	300	wound	3
435	ethanol spray	4	300	wound	1
435	ethanol spray	4	300	peri-wound	1
435	ethanol spray	4	300	peri-wound	1
435	ethanol spray	4	300	wound	1
435	ethanol spray	4	300	wound	1
435	ethanol spray	4	300	peri-wound	1
435	ethanol spray	4	300	peri-wound	1
435	ethanol spray	6	300	wound	2
435	ethanol spray	6	300	wound	1
435	ethanol spray	6	300	peri-wound	1
435	ethanol spray	6	300	peri-wound	1
435	ethanol spray	6	300	wound	1
435	ethanol spray	6	300	wound	1
435	ethanol spray	6	300	peri-wound	1
435	ethanol spray	6	300	peri-wound	1
436	ethanol spray	0	300	wound	1
436	ethanol spray	0	300	wound	1
436	ethanol spray	0	300	peri-wound	1
436	ethanol spray	0	300	peri-wound	1
436	ethanol spray	0	300	wound	1
436	ethanol spray	0	300	wound	1
436	ethanol spray	0	300	peri-wound	1
436	ethanol spray	0	300	peri-wound	1
436	ethanol spray	1	300	wound	1
436	ethanol spray	1	300	wound	2
436	ethanol spray	1	300	peri-wound	1
436	ethanol spray	1	300	peri-wound	1
436	ethanol spray	1	300	wound	2
436	ethanol spray	1	300	wound	3
436	ethanol spray	1	300	peri-wound	1
436	ethanol spray	1	300	peri-wound	1
436	ethanol spray	2	300	wound	1
436	ethanol spray	2	300	wound	1
436	ethanol spray	2	300	peri-wound	1
436	ethanol spray	2	300	peri-wound	1
436	ethanol spray	2	300	wound	1
436	ethanol spray	2	300	wound	1
436	ethanol spray	2	300	peri-wound	1
436	ethanol spray	2	300	peri-wound	2
436	ethanol spray	4	300	wound	1
436	ethanol spray	4	300	wound	2
436	ethanol spray	4	300	peri-wound	1
436	ethanol spray	4	300	peri-wound	1
436	ethanol spray	4	300	wound	1
436	ethanol spray	4	300	wound	3
436	ethanol spray	4	300	peri-wound	1
436	ethanol spray	4	300	peri-wound	1
436	ethanol spray	6	300	wound	2
436	ethanol spray	6	300	wound	3
436	ethanol spray	6	300	peri-wound	1
436	ethanol spray	6	300	peri-wound	1
436	ethanol spray	6	300	wound	1
436	ethanol spray	6	300	wound	3
436	ethanol spray	6	300	peri-wound	1
436	ethanol spray	6	300	peri-wound	1
437	ethanol spray	0	300	wound	1
437	ethanol spray	0	300	wound	1
437	ethanol spray	0	300	peri-wound	1
437	ethanol spray	0	300	peri-wound	1
437	ethanol spray	0	300	wound	1
437	ethanol spray	0	300	wound	1
437	ethanol spray	0	300	peri-wound	1
437	ethanol spray	0	300	peri-wound	1
437	ethanol spray	1	300	wound	1
437	ethanol spray	1	300	wound	3
437	ethanol spray	1	300	peri-wound	1
437	ethanol spray	1	300	peri-wound	1
437	ethanol spray	1	300	wound	1
437	ethanol spray	1	300	wound	1
437	ethanol spray	1	300	peri-wound	1
437	ethanol spray	1	300	peri-wound	1
437	ethanol spray	2	300	wound	1
437	ethanol spray	2	300	wound	1
437	ethanol spray	2	300	peri-wound	1
437	ethanol spray	2	300	peri-wound	1
437	ethanol spray	2	300	wound	1
437	ethanol spray	2	300	wound	1
437	ethanol spray	2	300	peri-wound	1
437	ethanol spray	2	300	peri-wound	1
437	ethanol spray	4	300	wound	3
437	ethanol spray	4	300	wound	2
437	ethanol spray	4	300	peri-wound	1
437	ethanol spray	4	300	peri-wound	1
437	ethanol spray	4	300	wound	1
437	ethanol spray	4	300	wound	2
437	ethanol spray	4	300	peri-wound	1
437	ethanol spray	4	300	peri-wound	3
437	ethanol spray	6	300	wound	4
437	ethanol spray	6	300	wound	4
437	ethanol spray	6	300	peri-wound	2
437	ethanol spray	6	300	peri-wound	3
437	ethanol spray	6	300	wound	3
437	ethanol spray	6	300	wound	3
437	ethanol spray	6	300	peri-wound	3
437	ethanol spray	6	300	peri-wound	3
414	sham dehorn	0	300	wound	1
414	sham dehorn	0	300	wound	1
414	sham dehorn	0	300	peri-wound	1
414	sham dehorn	0	300	peri-wound	1
414	sham dehorn	0	300	wound	1
414	sham dehorn	0	300	wound	1
414	sham dehorn	0	300	peri-wound	1
414	sham dehorn	0	300	peri-wound	1
414	sham dehorn	1	300	wound	1
414	sham dehorn	1	300	wound	1
414	sham dehorn	1	300	peri-wound	1
414	sham dehorn	1	300	peri-wound	1
414	sham dehorn	1	300	wound	1
414	sham dehorn	1	300	wound	1
414	sham dehorn	1	300	peri-wound	1
414	sham dehorn	1	300	peri-wound	1
414	sham dehorn	2	300	wound	1
414	sham dehorn	2	300	wound	1
414	sham dehorn	2	300	peri-wound	1
414	sham dehorn	2	300	peri-wound	1
414	sham dehorn	2	300	wound	1
414	sham dehorn	2	300	wound	1
414	sham dehorn	2	300	peri-wound	1
414	sham dehorn	2	300	peri-wound	1
414	sham dehorn	4	300	wound	1
414	sham dehorn	4	300	wound	1
414	sham dehorn	4	300	peri-wound	1
414	sham dehorn	4	300	peri-wound	1
414	sham dehorn	4	300	wound	1
414	sham dehorn	4	300	wound	1
414	sham dehorn	4	300	peri-wound	1
414	sham dehorn	4	300	peri-wound	1
414	sham dehorn	6	300	wound	1
414	sham dehorn	6	300	wound	1
414	sham dehorn	6	300	peri-wound	1
414	sham dehorn	6	300	peri-wound	1
414	sham dehorn	6	300	wound	1
414	sham dehorn	6	300	wound	1
414	sham dehorn	6	300	peri-wound	1
414	sham dehorn	6	300	peri-wound	1
415	sham dehorn	0	300	wound	1
415	sham dehorn	0	300	wound	1
415	sham dehorn	0	300	peri-wound	1
415	sham dehorn	0	300	peri-wound	1
415	sham dehorn	0	300	wound	1
415	sham dehorn	0	300	wound	1
415	sham dehorn	0	300	peri-wound	1
415	sham dehorn	0	300	peri-wound	1
415	sham dehorn	1	300	wound	1
415	sham dehorn	1	300	wound	1
415	sham dehorn	1	300	peri-wound	1
415	sham dehorn	1	300	peri-wound	1
415	sham dehorn	1	300	wound	1
415	sham dehorn	1	300	wound	1
415	sham dehorn	1	300	peri-wound	1
415	sham dehorn	1	300	peri-wound	1
415	sham dehorn	2	300	wound	1
415	sham dehorn	2	300	wound	1
415	sham dehorn	2	300	peri-wound	1
415	sham dehorn	2	300	peri-wound	1
415	sham dehorn	2	300	wound	1
415	sham dehorn	2	300	wound	1
415	sham dehorn	2	300	peri-wound	1
415	sham dehorn	2	300	peri-wound	1
415	sham dehorn	4	300	wound	1
415	sham dehorn	4	300	wound	1
415	sham dehorn	4	300	peri-wound	1
415	sham dehorn	4	300	peri-wound	1
415	sham dehorn	4	300	wound	1
415	sham dehorn	4	300	wound	1
415	sham dehorn	4	300	peri-wound	1
415	sham dehorn	4	300	peri-wound	1
415	sham dehorn	6	300	wound	1
415	sham dehorn	6	300	wound	1
415	sham dehorn	6	300	peri-wound	1
415	sham dehorn	6	300	peri-wound	1
415	sham dehorn	6	300	wound	1
415	sham dehorn	6	300	wound	1
415	sham dehorn	6	300	peri-wound	1
415	sham dehorn	6	300	peri-wound	1
416	sham dehorn	0	300	wound	1
416	sham dehorn	0	300	wound	1
416	sham dehorn	0	300	peri-wound	1
416	sham dehorn	0	300	peri-wound	1
416	sham dehorn	0	300	wound	1
416	sham dehorn	0	300	wound	1
416	sham dehorn	0	300	peri-wound	1
416	sham dehorn	0	300	peri-wound	1
416	sham dehorn	1	300	wound	1
416	sham dehorn	1	300	wound	1
416	sham dehorn	1	300	peri-wound	1
416	sham dehorn	1	300	peri-wound	1
416	sham dehorn	1	300	wound	1
416	sham dehorn	1	300	wound	1
416	sham dehorn	1	300	peri-wound	1
416	sham dehorn	1	300	peri-wound	1
416	sham dehorn	2	300	wound	1
416	sham dehorn	2	300	wound	1
416	sham dehorn	2	300	peri-wound	1
416	sham dehorn	2	300	peri-wound	1
416	sham dehorn	2	300	wound	1
416	sham dehorn	2	300	wound	1
416	sham dehorn	2	300	peri-wound	1
416	sham dehorn	2	300	peri-wound	1
416	sham dehorn	4	300	wound	1
416	sham dehorn	4	300	wound	1
416	sham dehorn	4	300	peri-wound	1
416	sham dehorn	4	300	peri-wound	1
416	sham dehorn	4	300	wound	1
416	sham dehorn	4	300	wound	1
416	sham dehorn	4	300	peri-wound	1
416	sham dehorn	4	300	peri-wound	1
416	sham dehorn	6	300	wound	1
416	sham dehorn	6	300	wound	1
416	sham dehorn	6	300	peri-wound	1
416	sham dehorn	6	300	peri-wound	2
416	sham dehorn	6	300	wound	1
416	sham dehorn	6	300	wound	1
416	sham dehorn	6	300	peri-wound	1
416	sham dehorn	6	300	peri-wound	1
417	sham dehorn	0	300	wound	1
417	sham dehorn	0	300	wound	1
417	sham dehorn	0	300	peri-wound	1
417	sham dehorn	0	300	peri-wound	1
417	sham dehorn	0	300	wound	1
417	sham dehorn	0	300	wound	1
417	sham dehorn	0	300	peri-wound	1
417	sham dehorn	0	300	peri-wound	1
417	sham dehorn	1	300	wound	1
417	sham dehorn	1	300	wound	1
417	sham dehorn	1	300	peri-wound	1
417	sham dehorn	1	300	peri-wound	1
417	sham dehorn	1	300	wound	1
417	sham dehorn	1	300	wound	1
417	sham dehorn	1	300	peri-wound	1
417	sham dehorn	1	300	peri-wound	1
417	sham dehorn	2	300	wound	1
417	sham dehorn	2	300	wound	1
417	sham dehorn	2	300	peri-wound	1
417	sham dehorn	2	300	peri-wound	1
417	sham dehorn	2	300	wound	1
417	sham dehorn	2	300	wound	1
417	sham dehorn	2	300	peri-wound	1
417	sham dehorn	2	300	peri-wound	1
417	sham dehorn	4	300	wound	1
417	sham dehorn	4	300	wound	1
417	sham dehorn	4	300	peri-wound	1
417	sham dehorn	4	300	peri-wound	1
417	sham dehorn	4	300	wound	1
417	sham dehorn	4	300	wound	1
417	sham dehorn	4	300	peri-wound	1
417	sham dehorn	4	300	peri-wound	1
417	sham dehorn	6	300	wound	1
417	sham dehorn	6	300	wound	1
417	sham dehorn	6	300	peri-wound	1
417	sham dehorn	6	300	peri-wound	1
417	sham dehorn	6	300	wound	1
417	sham dehorn	6	300	wound	1
417	sham dehorn	6	300	peri-wound	1
417	sham dehorn	6	300	peri-wound	1
438	sham dehorn	0	300	wound	1
438	sham dehorn	0	300	wound	1
438	sham dehorn	0	300	peri-wound	1
438	sham dehorn	0	300	peri-wound	1
438	sham dehorn	0	300	wound	1
438	sham dehorn	0	300	wound	1
438	sham dehorn	0	300	peri-wound	1
438	sham dehorn	0	300	peri-wound	1
438	sham dehorn	1	300	wound	1
438	sham dehorn	1	300	wound	1
438	sham dehorn	1	300	peri-wound	1
438	sham dehorn	1	300	peri-wound	1
438	sham dehorn	1	300	wound	1
438	sham dehorn	1	300	wound	1
438	sham dehorn	1	300	peri-wound	1
438	sham dehorn	1	300	peri-wound	1
438	sham dehorn	2	300	wound	1
438	sham dehorn	2	300	wound	1
438	sham dehorn	2	300	peri-wound	1
438	sham dehorn	2	300	peri-wound	1
438	sham dehorn	2	300	wound	1
438	sham dehorn	2	300	wound	1
438	sham dehorn	2	300	peri-wound	1
438	sham dehorn	2	300	peri-wound	1
438	sham dehorn	4	300	wound	1
438	sham dehorn	4	300	wound	1
438	sham dehorn	4	300	peri-wound	1
438	sham dehorn	4	300	peri-wound	1
438	sham dehorn	4	300	wound	1
438	sham dehorn	4	300	wound	1
438	sham dehorn	4	300	peri-wound	1
438	sham dehorn	4	300	peri-wound	1
438	sham dehorn	6	300	wound	1
438	sham dehorn	6	300	wound	1
438	sham dehorn	6	300	peri-wound	1
438	sham dehorn	6	300	peri-wound	1
438	sham dehorn	6	300	wound	1
438	sham dehorn	6	300	wound	1
438	sham dehorn	6	300	peri-wound	1
438	sham dehorn	6	300	peri-wound	1
439	sham dehorn	0	300	wound	1
439	sham dehorn	0	300	wound	1
439	sham dehorn	0	300	peri-wound	1
439	sham dehorn	0	300	peri-wound	1
439	sham dehorn	0	300	wound	1
439	sham dehorn	0	300	wound	1
439	sham dehorn	0	300	peri-wound	1
439	sham dehorn	0	300	peri-wound	2
439	sham dehorn	1	300	wound	1
439	sham dehorn	1	300	wound	1
439	sham dehorn	1	300	peri-wound	1
439	sham dehorn	1	300	peri-wound	1
439	sham dehorn	1	300	wound	1
439	sham dehorn	1	300	wound	1
439	sham dehorn	1	300	peri-wound	1
439	sham dehorn	1	300	peri-wound	1
439	sham dehorn	2	300	wound	1
439	sham dehorn	2	300	wound	1
439	sham dehorn	2	300	peri-wound	1
439	sham dehorn	2	300	peri-wound	1
439	sham dehorn	2	300	wound	1
439	sham dehorn	2	300	wound	1
439	sham dehorn	2	300	peri-wound	1
439	sham dehorn	2	300	peri-wound	1
439	sham dehorn	4	300	wound	1
439	sham dehorn	4	300	wound	1
439	sham dehorn	4	300	peri-wound	1
439	sham dehorn	4	300	peri-wound	1
439	sham dehorn	4	300	wound	1
439	sham dehorn	4	300	wound	1
439	sham dehorn	4	300	peri-wound	1
439	sham dehorn	4	300	peri-wound	1
439	sham dehorn	6	300	wound	1
439	sham dehorn	6	300	wound	1
439	sham dehorn	6	300	peri-wound	1
439	sham dehorn	6	300	peri-wound	1
439	sham dehorn	6	300	wound	1
439	sham dehorn	6	300	wound	1
439	sham dehorn	6	300	peri-wound	1
439	sham dehorn	6	300	peri-wound	1
440	sham dehorn	0	300	wound	1
440	sham dehorn	0	300	wound	1
440	sham dehorn	0	300	peri-wound	1
440	sham dehorn	0	300	peri-wound	1
440	sham dehorn	0	300	wound	1
440	sham dehorn	0	300	wound	1
440	sham dehorn	0	300	peri-wound	1
440	sham dehorn	0	300	peri-wound	1
440	sham dehorn	1	300	wound	1
440	sham dehorn	1	300	wound	1
440	sham dehorn	1	300	peri-wound	1
440	sham dehorn	1	300	peri-wound	1
440	sham dehorn	1	300	wound	1
440	sham dehorn	1	300	wound	1
440	sham dehorn	1	300	peri-wound	1
440	sham dehorn	1	300	peri-wound	1
440	sham dehorn	2	300	wound	1
440	sham dehorn	2	300	wound	1
440	sham dehorn	2	300	peri-wound	1
440	sham dehorn	2	300	peri-wound	1
440	sham dehorn	2	300	wound	1
440	sham dehorn	2	300	wound	1
440	sham dehorn	2	300	peri-wound	1
440	sham dehorn	2	300	peri-wound	1
440	sham dehorn	4	300	wound	1
440	sham dehorn	4	300	wound	1
440	sham dehorn	4	300	peri-wound	1
440	sham dehorn	4	300	peri-wound	1
440	sham dehorn	4	300	wound	1
440	sham dehorn	4	300	wound	1
440	sham dehorn	4	300	peri-wound	1
440	sham dehorn	4	300	peri-wound	1
440	sham dehorn	6	300	wound	1
440	sham dehorn	6	300	wound	1
440	sham dehorn	6	300	peri-wound	1
440	sham dehorn	6	300	peri-wound	1
440	sham dehorn	6	300	wound	1
440	sham dehorn	6	300	wound	1
440	sham dehorn	6	300	peri-wound	1
440	sham dehorn	6	300	peri-wound	1
441	sham dehorn	0	300	wound	1
441	sham dehorn	0	300	wound	1
441	sham dehorn	0	300	peri-wound	1
441	sham dehorn	0	300	peri-wound	1
441	sham dehorn	0	300	wound	1
441	sham dehorn	0	300	wound	1
441	sham dehorn	0	300	peri-wound	1
441	sham dehorn	0	300	peri-wound	1
441	sham dehorn	1	300	wound	1
441	sham dehorn	1	300	wound	1
441	sham dehorn	1	300	peri-wound	1
441	sham dehorn	1	300	peri-wound	1
441	sham dehorn	1	300	wound	1
441	sham dehorn	1	300	wound	1
441	sham dehorn	1	300	peri-wound	1
441	sham dehorn	1	300	peri-wound	1
441	sham dehorn	2	300	wound	1
441	sham dehorn	2	300	wound	1
441	sham dehorn	2	300	peri-wound	1
441	sham dehorn	2	300	peri-wound	1
441	sham dehorn	2	300	wound	1
441	sham dehorn	2	300	wound	1
441	sham dehorn	2	300	peri-wound	1
441	sham dehorn	2	300	peri-wound	1
441	sham dehorn	4	300	wound	1
441	sham dehorn	4	300	wound	1
441	sham dehorn	4	300	peri-wound	1
441	sham dehorn	4	300	peri-wound	1
441	sham dehorn	4	300	wound	1
441	sham dehorn	4	300	wound	1
441	sham dehorn	4	300	peri-wound	1
441	sham dehorn	4	300	peri-wound	1
441	sham dehorn	6	300	wound	1
441	sham dehorn	6	300	wound	1
441	sham dehorn	6	300	peri-wound	1
441	sham dehorn	6	300	peri-wound	1
441	sham dehorn	6	300	wound	1
441	sham dehorn	6	300	wound	1
441	sham dehorn	6	300	peri-wound	1
441	sham dehorn	6	300	peri-wound	1
432	sham dehorn	0	300	wound	1
432	sham dehorn	0	300	wound	1
432	sham dehorn	0	300	peri-wound	1
432	sham dehorn	0	300	peri-wound	1
432	sham dehorn	0	300	wound	1
432	sham dehorn	0	300	wound	1
432	sham dehorn	0	300	peri-wound	1
432	sham dehorn	0	300	peri-wound	1
432	sham dehorn	1	300	wound	2
432	sham dehorn	1	300	wound	1
432	sham dehorn	1	300	peri-wound	1
432	sham dehorn	1	300	peri-wound	1
432	sham dehorn	1	300	wound	1
432	sham dehorn	1	300	wound	1
432	sham dehorn	1	300	peri-wound	1
432	sham dehorn	1	300	peri-wound	1
432	sham dehorn	2	300	wound	1
432	sham dehorn	2	300	wound	1
432	sham dehorn	2	300	peri-wound	1
432	sham dehorn	2	300	peri-wound	1
432	sham dehorn	2	300	wound	1
432	sham dehorn	2	300	wound	1
432	sham dehorn	2	300	peri-wound	1
432	sham dehorn	2	300	peri-wound	1
432	sham dehorn	4	300	wound	1
432	sham dehorn	4	300	wound	1
432	sham dehorn	4	300	peri-wound	1
432	sham dehorn	4	300	peri-wound	1
432	sham dehorn	4	300	wound	1
432	sham dehorn	4	300	wound	1
432	sham dehorn	4	300	peri-wound	1
432	sham dehorn	4	300	peri-wound	1
432	sham dehorn	6	300	wound	1
432	sham dehorn	6	300	wound	1
432	sham dehorn	6	300	peri-wound	1
432	sham dehorn	6	300	peri-wound	1
432	sham dehorn	6	300	wound	1
432	sham dehorn	6	300	wound	2
432	sham dehorn	6	300	peri-wound	1
432	sham dehorn	6	300	peri-wound	1
